# Supplementary material
Source: PubMed Central journal article supplement (PMC5378478)
Supplement: NIHMS853264-supplement-supplement_1.pdf [file NIHMS853264-supplement-supplement_1.pdf]

Fig S1

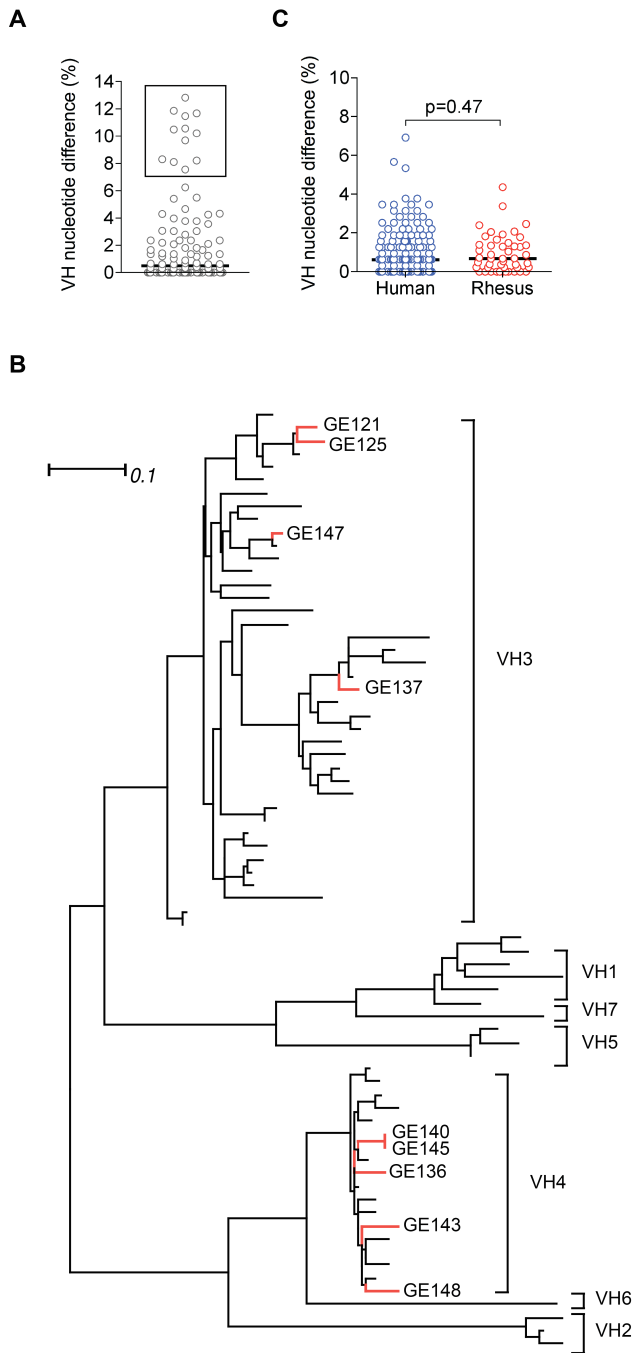

**Figure S1. Examination of VH sequences.**

(A) Sequences of published rhesus macaque heavy chain germline VH genes were aligned to VH genes identified in the rhesus macaque reference genome (19). Deviations from germline were determined and presented as percent VH nucleotide difference. The box indicates deviations larger than those observed between allelic variants of human VH genes, indicating that these sequences may represent unique VH genes that are not available in the current reference genome. (B) The phylogenetic relationship of the VH regions of the isolated GE121, GE125, GE136, GE137, GE140, GE143, GE145, GE147, and GE148 MAbs compared to VH genes identified from the rhesus macaque reference genome. (C) Nucleotide variation among allelic variants of human VH genes compared to allele \*01 (blue) and between a collection of Chinese and Indian rhesus macaque VH genes (red). There was no significant difference between the groups as determined with a Mann-Whitney test, indicating that the variation observed between Chinese and Indian rhesus VH genes fall within normal allelic variation.

Fig S2

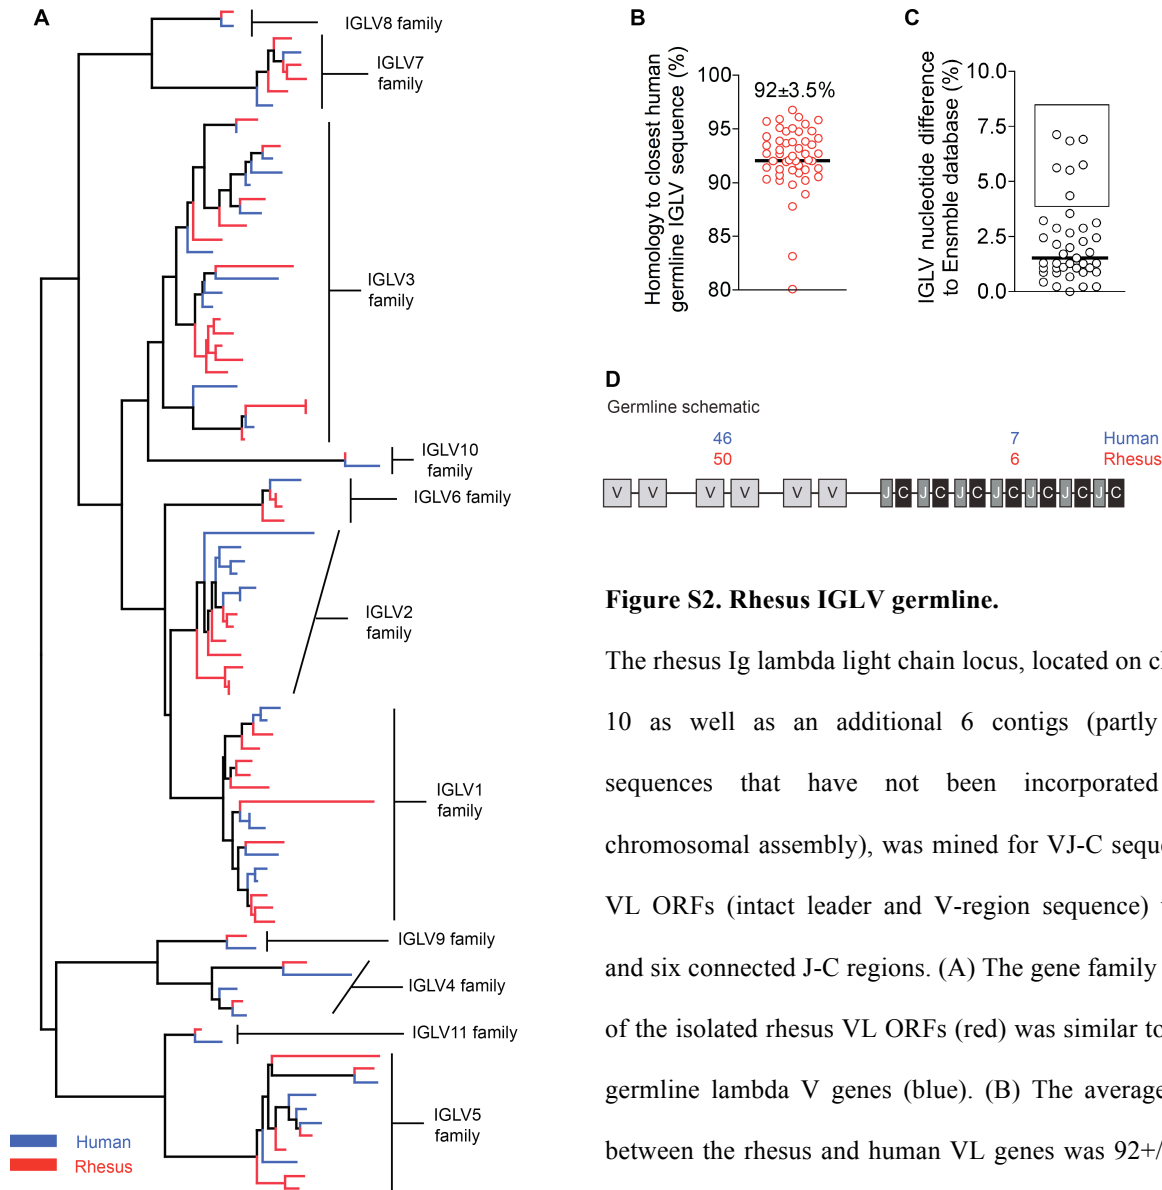

**Figure S2. Rhesus IGLV germline.**

The rhesus Ig lambda light chain locus, located on chromosome 10 as well as an additional 6 contigs (partly assembled sequences that have not been incorporated into the chromosomal assembly), was mined for VJ-C sequences. Fifty VL ORFs (intact leader and V-region sequence) were found and six connected J-C regions. (A) The gene family distribution of the isolated rhesus VL ORFs (red) was similar to the human germline lambda V genes (blue). (B) The average homology between the rhesus and human VL genes was  $92 \pm 3.5\%$  (SD;  $n=50$ ). (C) When comparing allelic variation to previously isolated VL germline genes (23) there were some sequences displaying a higher level of diversity ( $>4\%$  difference) indicating that perhaps not all VL germline genes are identified in the current rhesus genome assembly (19). (D) Schematic representation of the rhesus lambda locus indicating general VJ-C gene organization and number of genes found.

Fig S3

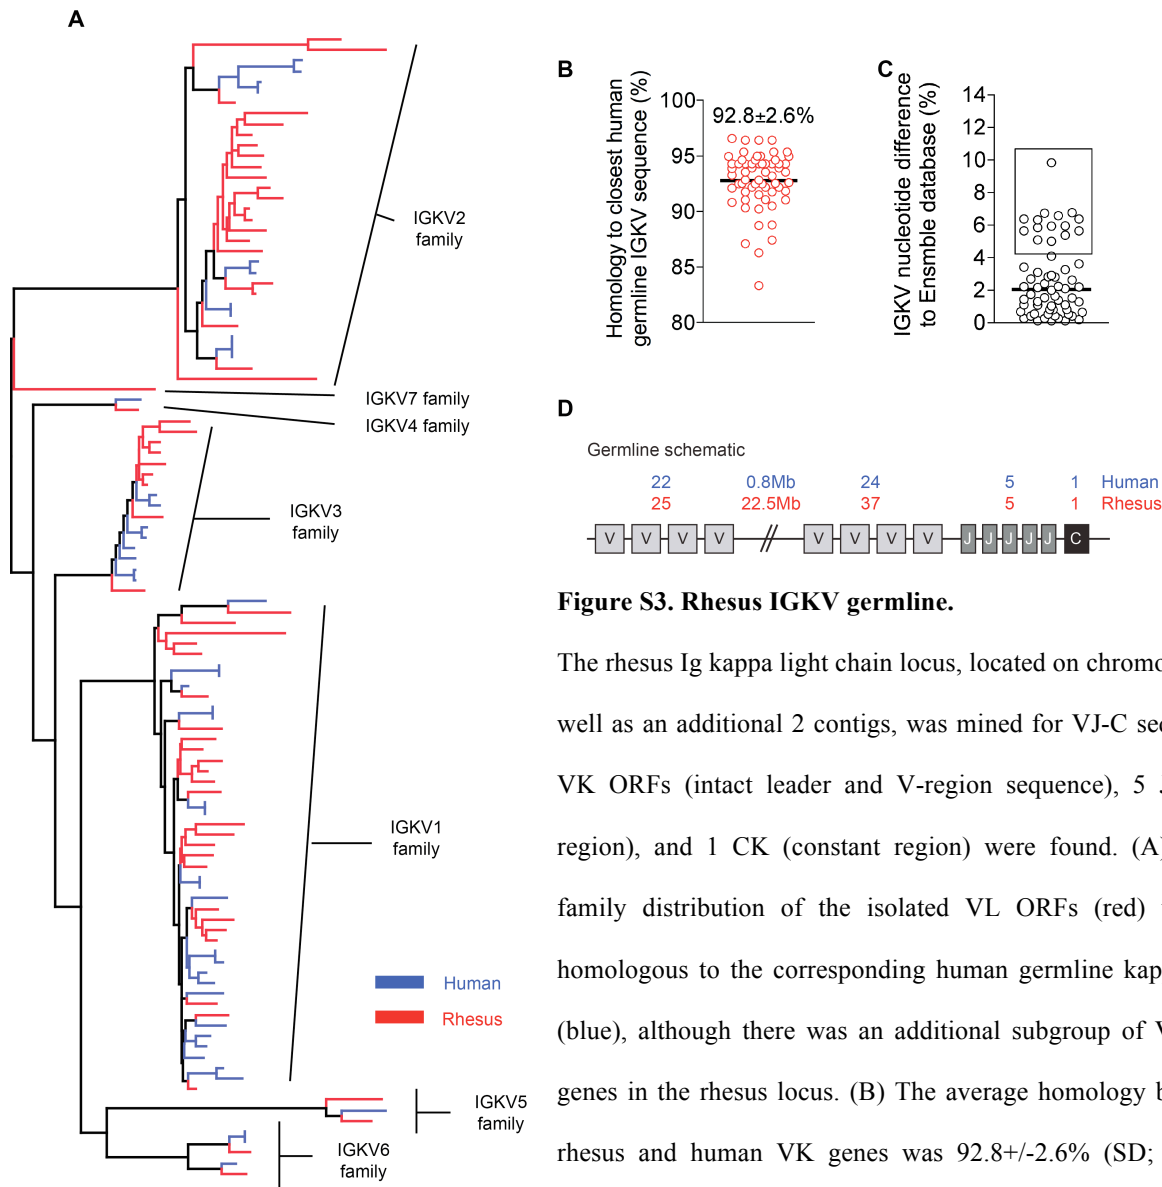

**Figure S3. Rhesus IGKV germline.**

The rhesus Ig kappa light chain locus, located on chromosome 13 as well as an additional 2 contigs, was mined for VJ-C sequences. 62 VK ORFs (intact leader and V-region sequence), 5 JK (joining region), and 1 CK (constant region) were found. (A) The gene family distribution of the isolated VL ORFs (red) was highly homologous to the corresponding human germline kappa V-genes (blue), although there was an additional subgroup of VK2 family genes in the rhesus locus. (B) The average homology between the rhesus and human VK genes was 92.8+/-2.6% (SD; n=62). (C) When comparing allelic variation to previously isolated VK germline genes (24) there were some sequences displaying a higher level of divergence (>4% difference) indicating that possibly not all VK germline genes are represented in the current rhesus genome assembly (19). (D) Schematic representation of the rhesus lambda locus indicating general VJ-C gene distribution and the number of genes found. Two distant clusters of VK genes were found in the assembled rhesus macaque genome.

**Fig S4**

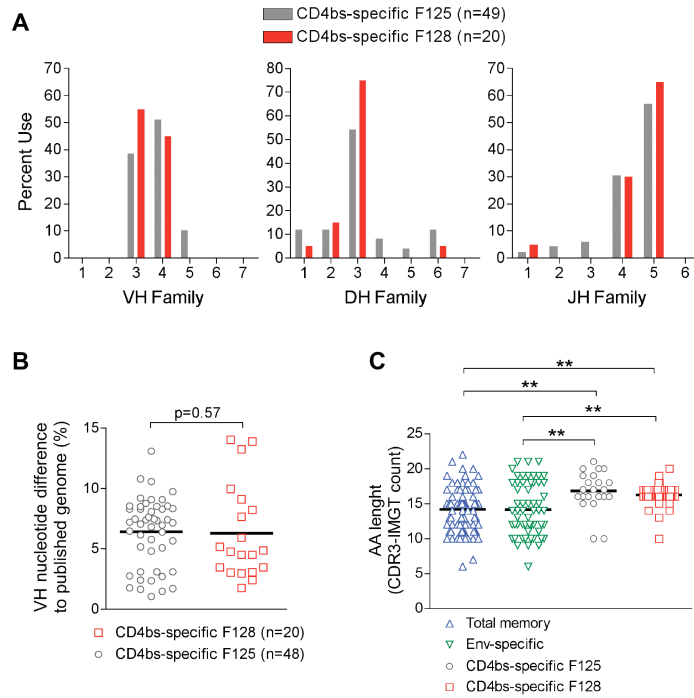

**Figure S4. CD4bs-specific VDJ sequence evaluation in monkeys F125 and F128.**

CD4bs-specific memory B cells were sorted and antibody genes amplified and sequenced from one additional monkey (F125; n=49, gray circles) two weeks following the fifth immunization with gp140-F in adjuvant (as described for F128 and in reference (26)) and compared to sequences from monkey F128 (red boxes). (A) Heavy chain VDJ gene family usage was evaluated, using IMGT/V-Quest, and was highly homologous between the two monkeys. (B) SHM levels were determined via aligning the V-regions to the germline counterpart. There was no statistically significant difference in the SHM level of the CD4bs-specific sequences in the two monkeys as determined by the Mann-Whitney test. (C) The CDR3 lengths were significantly longer for the CD4bs-specific sequences in both monkeys in comparison to total memory (CD20+CD27+IgG+) and total Env-specific (CD20+CD27+IgG+gp140-FT+) memory B cells. Statistics was determined by the Kruskal-Wallis test followed by Dunn's multiple comparison test, where  $**p<0.01$ . In conclusion the CD4bs-specific sequences were highly homologous between the different monkeys.

**Fig S5**

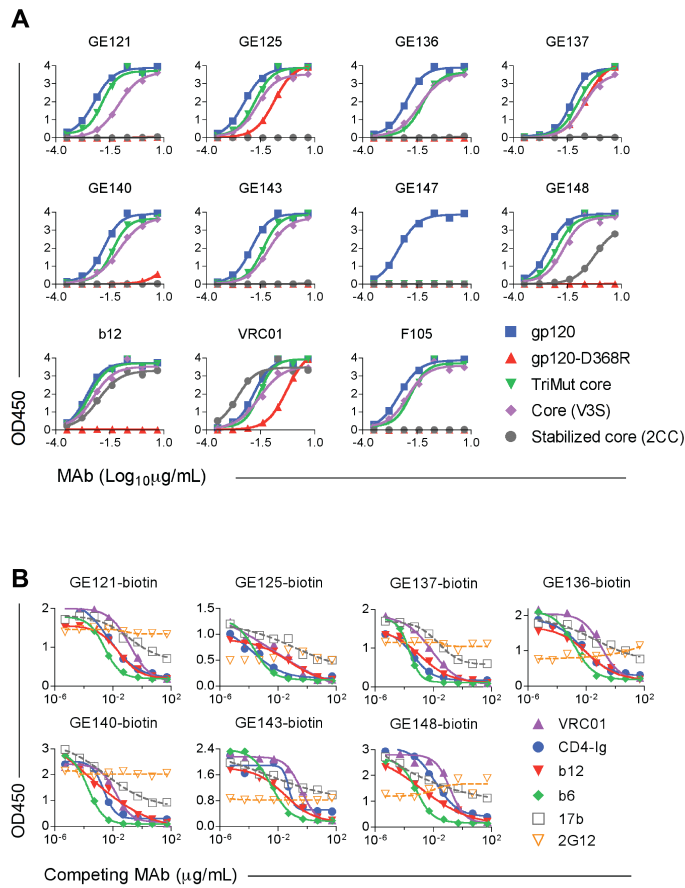

**Figure S5. Binding specificities of isolated MAbs.** (A) The NHP MAbs and known human CD4bs-directed MAbs, b12, VRC01 and F105, were characterized for their capacity to bind gp120, gp120-D368R, core (V3S), stabilized core (2CC) and TriMut core by ELISA. Titration curves are shown as  $\text{Log}_{10}$  dilutions ( $\mu\text{g/mL}$ ). (B) Binding by the biotinylated NHP MAbs to gp120 in the presence of increasing concentrations of competing ligands (CD4bs-directed human MAbs, b6, b12, VRC01 and CD4-Ig, CoRbs-directed MAb, 17b, and a control MAb, 2G12) is shown as titration curves of the competing ligand in  $\mu\text{g/mL}$ .

**Fig S6**

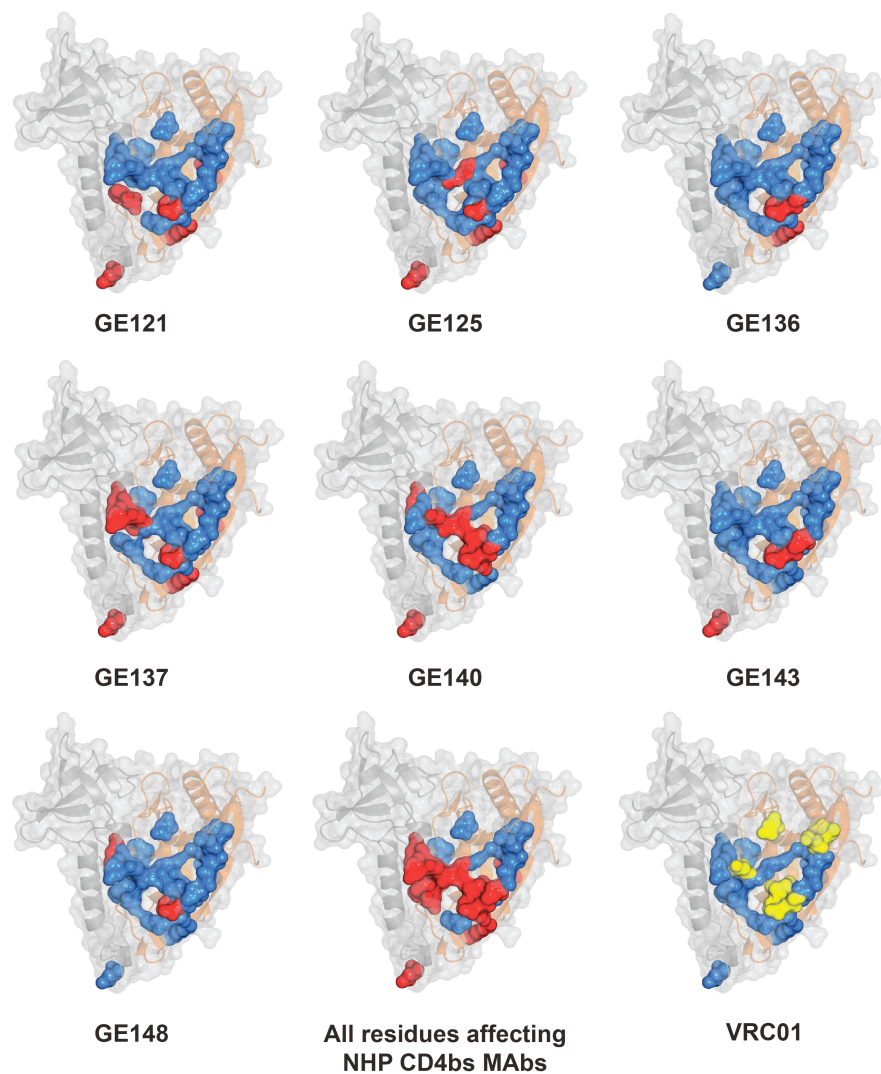

**Figure S6. Amino acid residues affecting individual MAb binding to gp120 modeled on the core structure.** Residues identified in the Ala scan that result in a 3-fold reduction in gp120 binding by the individual vaccine-elicited NHP MAbs are marked in red and those affecting VRC01 binding are marked in yellow. Shown in blue are the combined residues targeted in the Ala scan analysis. Behind the transparent surface of the core, the alpha carbon backbone of the inner domain and bridging sheet are shown in gray and the outer domain in salmon. Lower-mid panel shows the combined residues affecting recognition of the NHP MAbs to gp120.

**Table S1. Heavy chain germline V-gene analysis and annotation**

| Sequence ID <sup>a</sup> | Closest corresponding human IGHV gene <sup>b</sup> | Homology (%) <sup>c</sup> | Sequence                                                                                                                                                                                                                                                                                                                              | Genomic location <sup>d</sup> |
|--------------------------|----------------------------------------------------|---------------------------|---------------------------------------------------------------------------------------------------------------------------------------------------------------------------------------------------------------------------------------------------------------------------------------------------------------------------------------|-------------------------------|
| VH6.1                    | IGHV6-1*01 F                                       | 95.3                      | cagggtcagctgcaggagtcagggtccaggactgggtaagccctcacagaccctgtc<br>actcaccctgtccatctccggggacagtgctctagcaacagtgctacttggaaactgg<br>atcaggcagtcgcatctcgagagcccttgagtgctgggaaggacatactacaggtc<br>caagtggtataatgatgatgcaaatctgtgcaaaatcgaataagatcaaccaggca<br>cacatccaagaaccagttctccctgcagctgaactctgtgacccccgagggacatgg<br>ccgtgtattactgtcaagaga | Ch7                           |
| VH3.2                    | IGHV3-66*02 F                                      | 91.6                      | gaggtgcagttggtgagctcggggaggcttggtacagcctggggctccctgag<br>actctctgtacaggtctggattcaccttcagtagctactacatgactgggtccgcca<br>ggctccagggaaagggctggaggggtctcagcttaataactgtgggggtgagca<br>catggtacacagactccgtgaagggccgattccatctccaagaagaaacgcca<br>gaacacactgtattccaatggagacccctgagagctgaggacacggctgtattata<br>ctgtgcgaagaga                    | Ch7                           |
| VH2.3                    | IGHV2-70*10 F                                      | 94.5                      | caggctacctgaaggagctgatctgcgctagtgaaaccacacagaccctcac<br>gctgacctgcacctctcgggttctcactcagcactctggaatgggtgtggacggga<br>tcgctgacccccagggaagggcctggagtgctgcacgactgattgggtgagtg<br>ataaatactacagccatctgctgaagagcaggctcaccatctccaaggacacctcc<br>aagaaccaggtgtcctcaatgacccaactggaccctgtggacacagccaacata<br>ttactgtgcagggagac                  | Ch7                           |
| VH3.4                    | IGHV3-48*01 F                                      | 94.3                      | gaggtgcagctggtgagctcggggaggcctgtgacagcctggcggtccctgag<br>accctctgtgcagcctcggattcaccttcagtagctatggcatgactgggtccgcc<br>aggctccggaagagggctgggtgggtttcattacattggtagtagtaccatgtacta<br>cgcagactcgtgaagggccgattccatctccagagacaatccaagaactcg<br>ctgtatctcaaatgaacagcctgagagccgaggacacggctgtattactgtgtga<br>gaga                              | Ch7                           |
| VH3.5                    | IGHV3-72*01 F                                      | 91.8                      | gaggtgcagctggtgagctcggggaggcctgtgacagcctgggggtccctgag<br>actcctctgtgcagcctcggattcaccttcagtaactactacatgactgggtccgcc<br>aggctcaagggaagggctgagtggttgaatggttaataaagaacaaagctaaaca<br>gttacacgacagaatgctgcggtgtgaaagggcagattccatctcaagagatg<br>attcaagaacacagctgtatctgcaaatgagcagcctgaaaccggaggacacagc<br>cctgtattactgtactaaa              | Ch7/C6                        |
| VH3.6                    | IGHV3-15*08 F                                      | 91.8                      | gaggtgcagctggtgagctcggggaggcctgtgacagcctgggggtccctgag<br>actcctctgtgcagcctcggattcaccttcagtaactactggatgagctgggtccgcc<br>aggctccagggaaagggctggactgggtggtattataaaacaaagctgagtg<br>gaacagcagcatalccgaaactgtgaaagggcagattccatctcaagagatgat<br>tcaagaacacacactgtatctgcaaatgagcagcctgaaaccggaggacacggcc<br>gtgtattactgtactagaga              | Ch7                           |
| VH5.7                    | IGHV5-51*01 F                                      | 95.1                      | gaggtgcagctggtgagctcggggaggcctgtgacagcctgggggtccctgag<br>agatctctgtaagactctggatacagcttaccagctactggtacagctgggtcgcg<br>cagatcccggaagggcctggagtggtgagggggcgattgatctagtgattctgat<br>accagatacagccctctccaagggcaggctcaccatctcagccgacaagctccat<br>cagcaccgctcctcagtgagcagcctgaaagcctgggacacccgcaactgat<br>tactgcgcaagaga                     | Ch7                           |
| VH3.8                    | IGHV3-h*01 P                                       | 90.9                      | gaggtgcagctggtgagctcggggaggcctgtgacagcctgggggtccctgag<br>gacictctgtgcagcctcggattcaccttcagtaactactggatgactgggtccgc<br>aggcaccagggaaagggctggagtggtactcagcttaataatgctggtgtagtgc<br>acatactatgcagactccgtgaaagggcagattccatctccaagagaaacgcca<br>agaacacactgtattccaatggagcctgagagctgaggacacggctgtctatt<br>actgtcggggaga                      | Ch7                           |
| VH3.9                    | IGHV3-15*01 F                                      | 91.5                      | gaggtgcagctggtgagctcggggaggcctgtgacagcctgggggtccctgag<br>actcctctgtgcagcctcggattcaccttcagtaactactggatgagctgggtccgcc<br>aggctccagggcaagggctgagtggtggtccctgattaaagaaagctgagcgg<br>tgagacagcagattacggcctcgtgaaagggcagattccatctcaagagagc<br>attcaagaacacactgtactcgaatgaaacagcctgaaaccggaggacacgg<br>ccgtgtattactgaccacaga                 | Ch7                           |
| VH3.10                   | IGHV3-49*04 F                                      | 92.2                      | gaggtgcagctggtgagctcggggaggcctgtgacagcctgggggtccctgag<br>actcctctgtgcagcctcggattcaccttcagtagtattgctgagctgggtccgcca<br>ggctccagaaaggggtggagtggtggtttcattagaagcaaaactgattggtg<br>gacagagaatacggcctctgtgaaagggcagattccatctccaagagatgatt<br>caaaagaacagcgtatctgcaaatgagcagcctgaaaccggaggacacggcc<br>gtgtattactgtactagaga                  | Ch7                           |
| VH4.11                   | IGHV4-39*07 F                                      | 91.4                      | cagctgcagctcagaggatcggggccaggactgggtaagccttcggagaccctgtc<br>ctcaccctgcgtctctgtggtcctccatcagcagtaactactggagctggatccgc<br>cagcccccaagggaaagggactggagtggtgagctatctgtgtagtgggggag<br>caccgactacaacccctccctcaagagctgagctcaccattcaacagacacgtcca<br>agaaccagttctccctgaagctgagctctgtgacccgagcggacacggcctgtatt<br>actgtgcgagaga                | Ch7                           |
| VH2.12                   | IGHV2-5*08 F                                       | 94.8                      | caggtgacctgaaggagctgtcctcctgctggtgaaaccacacagaccctcac<br>gctgacctgcacctctcgggttctcactcagcactagtggtatgggtgggtggat<br>ccgtcagcctcaggaagaccctggagtggtcgcacacattattgggtgagtgat<br>aagcgtctacagacatctctgaaagagcaggtccatctccaagggacacctcca<br>aaaaccaggtggttcaacaatgaccaaatggaccctatggacacagccacatatt<br>tactgtgcagggagac                   | Ch7                           |
| VH3.13                   | IGHV3-48*01 F                                      | 91.1                      | gaggtgcagctggtgagctcggggaggcctgtgacagcctgggggtccctgag<br>actcctctgtgcagcctcggattcaccttcagtagctggtgagctgggtccgcca<br>aggctccggaaagggctggagtggtcttcagacattatggttagtaccatgtacta<br>cggagactctgaaagggcctattcaccgtctccagagacaatccaagaactcgt<br>gtctctcaaatgaacagctgagagccaggacacggccgtgtattactgt                                           | Ch7                           |
| VH3.14                   | IGHV3-11*01 F                                      | 87.2                      | gaggtgcagctggtgagctcggggaggcctgtgacagcctgggggtccctgag<br>actcctctgtgcagcctcggattcaccttcagtagcactacatggagtggtccgcc<br>aggctccagaaagggctgagtggtgagcaaaatattcctaatgggggtacc<br>acattcctcagtggtcgtgaaagggcagattccatctccaagagacaacgccaag<br>aacaagcttattctgaaaitaacagcctgaaaitagaggacacggcctgtattact<br>gtactagaga                         | Ch7                           |
| VH3.15                   | IGHV3-h*01 P                                       | 92.3                      | gaggtgcagctggtgagctcggggaggcctgtgacagcctgggggtccctgag<br>gacictctgtgcagcctcggattcaccttcagtagctactactggactgggtccg<br>ccaggctccaggaagggctggagtggtctcagtagtattggtggtgag                                                                                                                                                                  | Ch7                           |

|        |                 |      |                                                                                                                                                                                                                                                                                                                             |     |
|--------|-----------------|------|-----------------------------------------------------------------------------------------------------------------------------------------------------------------------------------------------------------------------------------------------------------------------------------------------------------------------------|-----|
|        |                 |      | cacatggtacgcagactccgtgaagggcagattcaccatccagagagaacgcc<br>aagaacacactgtatctcaaatgaacagcctgagagctgaggacacggctgtctat<br>tactgtgcgaaga                                                                                                                                                                                          |     |
| VH1.16 | IGHV1-46*01 F   | 89.6 | cagggtcagctggtgagctctggggctgagataaagcagcctggggcctcagtgaa<br>gctctcctcaaggctctggatatacctcactagctactacatgactgggggagac<br>aggccccggacaagggcctgagtgataggaatgctccccataatgtaaca<br>aagctacgcacagaactccagggcagagctaccataactacggacacgtccac<br>gagcacaggtactaggagctgagcagcctgagatctgaggacacacggctgatt<br>actgtacgagaga               | Ch7 |
| VH3.17 | IGHV3-h*01 P    | 91.2 | gagggtcagctggtggagctctggggaggctgtgctcagcctgggggctccctgag<br>actctcctgagcagcctctgattcaccitgggtgattgagcactgggtccgcca<br>ggctccggaaagggactggagtggtctcatccattagtaacactgtaaaaccgt<br>atactacgtgactccgtgagggccgattcaccgtccagagacaacgcccaaga<br>actcgtctctcgaatgagcagcctgagagccgaggacacggcgtgtattact<br>gtactagaga                 | Ch7 |
| VH3.18 | IGHV3-71*01 P   | 93.2 | gagggtcagctggtggagctctggggaggctgtgctcagcctgggggctccctgag<br>actctcctgagcagcctcggattcaccitcagtgactactacatgtactgggtccgcc<br>aggctccaggaagggcctggagtggtgggttctcattagaagcaaaactacgtg<br>gggacagcagaatccggcctctgtgaaaggcagattcaccatccagagatg<br>attccaaaagcactcctatctgcaaatgagcagcctgaaaaccgaggacacggc<br>cgtgtattactgtactagga   | Ch7 |
| VH3.19 | IGHV3-73*01 F   | 94.6 | gagggtcagctggtggagctctggggaggctgtgctcagcctgggggctccctgag<br>accctctgtgagcctctgattcaccitcagtgattctgctgactgggtccgcca<br>ggctctgggaaagggactggagtggtgggtgagcgtattaagaagcaaatcaacaatta<br>cgagacagaatccggcctcgtgaaaggcagattcaccatccagagatgatt<br>caagaacacggcgtatctgcaaatgaaacgctgaaaaccgaggacacggcc<br>gtgtattactgtactagaga     | Ch7 |
| VH5.20 | IGHV5-78*01 P   | 95.1 | gagggtcagctggtgagctctggagcagagtgaaaaggccccgggagctctga<br>ggatctctgaagactctggatcacgcttaccagctactgagcagctgggtgagc<br>cagatgccccgggagagaaactggagtggtgggagcctcattcctgggacactctg<br>atccagatacaaccctcctcaaggcaggtcaccatctcagccgacagctcc<br>atcagaccgtctcctcagtgagcagcctgaaagcctcggactccgcatgtat<br>tattgtc                       | Ch7 |
| VH7.21 | IGHV7-81*01 ORF | 94.4 | cagggtcagctggtgagctctggggcctgaggtgaagcagcctggggcctcagtgaa<br>ggtctcctcaaggctctggttacagcttaccacactggtatgaaatgggtgagcag<br>aggccccggacaagggcctgagtggtggatggatgaaacactacactgggaa<br>cccaacglatgcccaggcctcacaagaacgggttctctcctcagacacactctgca<br>gcaagctgactcagatcagcagcctaaagggtgaggacacggcgtgtattac<br>tgtgcgagata            | Ch7 |
| VH4.22 | IGHV4-39*07 F   | 90.4 | cagggtcagctgagcagagctggggccaggactgggaaagcctcggagaccctgt<br>ccctcactgctgctctctggtgctccatcagcgttactactgaaactggatccgc<br>caacccccagggaaagggcctgagtggtggatggatlatcgggtgtagtggggag<br>cactactcaacccctcccaagagtcgagctaccattcaacggacacgtccaa<br>gaaccagttctcctgaagctgagctctgagcccgcggaacggcctgtatta<br>ctgtgcgagaaa                | C1  |
| VH1.23 | IGHV1-2*02 F    | 92.4 | cagggtcagctggtgagctctggggcctgaggtgaagaagcctgggtcctcagtgaa<br>ggtatcctcaaggctcctggatatacactcactgactactacatgactgggtgagca<br>caggcccccgacaagggcctgagtggtggatggatgaaacactcaaatggcaca<br>cacaagatgacagaaagctccagggcagagctaccatgacacagagacacatc<br>gacgagcagacagcctacatggagctgagcagcctgagatctgaggacacggcctg<br>gtattactgtgcgagaga | C1  |
| VH3.24 | IGHV3-48*03 F   | 91.3 | gagggtcagctggtggagctctggggaggctgtgctcagcctgggggctccctgag<br>actctcctgagcagcctctgattcaccitcagtgatgacgacatgagctgggtccgc<br>aggctctgggaaagggcctgagtggtctcatccattagtaacactgtaaaacc<br>atactactcgtgactcctgaaaggcggattcaccatccagagacaacgcccaa<br>gaaactcgtctctcgaatgaaacgctgaaaaccgaggacacggcctgtatt<br>actgtactagga              | C1  |
| VH2.25 | IGHV2-70*10 F   | 95.5 | cagggtaccctgaaggagctggtcctcgtggtgaaacccacacagaccctcac<br>gctgactgacactctctggttctcactcagcactagtgatgggtgggtggtgag<br>cgtcagccccagggaaagggcctggaaatggctgcaagcattatgggatgagca<br>taatactacagcactctcgaagagcaggtcaccatcccaaggacacactcca<br>aaaaccaggtggttcaacaatgaccaacatggaccctgaggacacagccacat<br>tactgtcacgggtac               | C1  |
| VH4.26 | IGHV4-4*07 F    | 90.3 | cagggtcagctgagcagagctggggccaggactgggaaagcctcggagaccctgc<br>ccctcactgctgctctggtgctccatcagcagtaactactggagctggatccgc<br>caggccccagggaaagggactggagtggtggatgagctatctgtagtggggag<br>caccgactcaacccctcccaagagtcgagctaccattcaatagacacgtgca<br>agaaccagttctcctgaagctgagctctgtagcccgcggaacggcctgtatt<br>actgtgcgagaga                 | C1  |
| VH3.27 | IGHV3-13*01 F   | 90.5 | gtgagcagctggtggagctctggggaggcctggtagcagcctggggcctccctgag<br>actctcctgagcagcctctgaattcaccitcagtgatgacatgactgggttccca<br>ggctccagggaaagggctgagtggtatcagctattagcattggcggtggcaata<br>ctaccagactctggaaggtcgtaccatctccagagacaatccaagaactc<br>ctgtatctcaaatgaacagcctgagagctgaggacactgctgtattattgtgcaa<br>gaga                      | C1  |
| VH4.28 | IGHV4-61*01 F   | 94.5 | cagggtcagctgagcagagctggggccaggactgggaaagcctcggagaccctgt<br>ccctcactgctgctctggtgctccatcagcagtggttactactactggagctgg<br>atccgccccagggaaagggactggagtggtggatggatcactactatagtg<br>gagcaccagctcaacccctcccaagagtcgagctaccattcaagagacagctg<br>ccaagaaccagttctcctgaagctgagctctgtagcccgcggaacggcctgtg<br>tattactgtgcgagaga             | C1  |
| VH3.29 | IGHV3-73*01 F   | 95.2 | gagggtcagctggtggagctctggggaggcctgtgctcagcctgggggctccctgag<br>actctcctgagcagcctctgattcaccitcagtgattctgctgactgggtccgcca<br>ggctctgggaaagggactggagtggtgggtgagcgtattaagaagcaaatcaacaatta<br>cgagacagatacgtcgtggtgaaaggcaggttaccatctccagagatgatt<br>caagaacacggcgtatctgcaaatgaaacgctgaaaaccgaggacacggcc<br>gtgtattactgtaccacaga  | C1  |
| VH3.30 | IGHV3-71*01 P   | 94.6 | gagggtcggctggtggagctctggggaggcctgtgctcagcctgggggctccctgag<br>actctcctgagcagcctctgattcaccitcagtgactactacatgagctgggtccgc<br>aggctccaggaagggcggagtggtggttctcattagaacaaagctataggt<br>gggacagcagaatccggcctctgtgaaaggcagattcaccatccagagatg<br>attccaaaagcattgctgcaaatgaaacgctgaaaaccgaggacacggc                                   | C1  |



|        |               |      |                                                                                                                                                                                                                                                                                                                        |    |
|--------|---------------|------|------------------------------------------------------------------------------------------------------------------------------------------------------------------------------------------------------------------------------------------------------------------------------------------------------------------------|----|
|        |               |      | cggttactgtgtagaga                                                                                                                                                                                                                                                                                                      |    |
| VH3.31 | IGHV3-11*05 F | 91.7 | gaggtgcagctggcggagctggtggggaggcttggtccagcctggggggccctgag<br>actctcctgtgcagcctcgggattcactcctcagtgctacgaaatgcaactgggtccgc<br>caggctccagggaaagggctggagctcctcagttattggtggtatagtagtaca<br>cacactacgagactctgtgaagggccgattccacctccagagacaacgccaa<br>gaactcgtctctcgaatgaacagcctgagagccgaggacacggcctgtatt<br>actgtgcgagaga      | C1 |
| VH3.32 | IGHV3-66*02 F | 92.5 | Gaggtgcagctgggtgagctggtggggcggtggcaagcctggggggccctga<br>gactctcctgtgcagcctcggattcaactcagtagctactggaatgggtccgcc<br>agactccagggaaagggctggagtggtctcagctattaatagtggtggggtagc<br>acatactacgagactccgtgaagggccgattccacctccagagacaactccaa<br>gaacagctctccctgcaaatgaacagcctgagagctgaggaca (partial<br>sequence)                 | C1 |
| VH3.33 | IGHV3-h*01 P  | 92.3 | gacgtgcagctggtggagctggtggggaggctggtaaagcctggggggccctgag<br>actctcctgtgtagcctcgggttcaactcagtagctacgaaatgcaactgggtcccca<br>ggctccagaaagggctggagtggtctcagttattgtaagagtggtggtaccac<br>atactacgagactcctgtgaagggccgattccacctccagagacaacgccaa<br>aacactcgtttctcgaatgaacagcctgagagccgaggacaacggcctgtattac<br>tgtactagaga       | C1 |
| VH4.34 | IGHV4-b*01 F  | 93.9 | caggtgcagctcaggagctggggccaggactggtgaagcctcggagaccctgt<br>ccctcactcgtctgtctcgttactccatcagcagtggttactactgggtggatcc<br>gtcagccccagggaaagggactggagatattgggtatcagtgtagtagtgga<br>gcaactctacaacccccctcaagagctcagctcaccattcaaaagacagctcca<br>agaaccagttctcctgaagctgagctctgtgaccgccggacacggcctgtatt<br>actgtgcgagaga           | C1 |
| VH4.35 | IGHV4-39*07 F | 90.4 | caggtgcagctcaggagctggggccaggactggtgaagcctcggagaccctgt<br>ccctcactcgtctgtctcgttggctccatcagcagtagtaactggtgagctggatc<br>cgccagctccagggaaagggctggaaatgattgggggtatctatgtagtggtgg<br>gagcaccgaatacaacccccctcaagagctcagctcaccattcaatagacagct<br>ccaagaaccagttctcctgaagctgagctctgtgaccgccggacacggcctgt<br>tattactgtgcgagaga    | C1 |
| VH1.36 | IGHV1-69*10 F | 94.8 | caggtccagctgggtcagctcggggctgaggtgaagagcctggggcctcagtg<br>aggittcctgcaagctcctggattcaactcggcagctatctatcagctgggtgca<br>caggccccggacaagggctgagtgattggagtgatccctctgtgtgataaa<br>caaacctacgagaaagttccagggcagagctcagctaccggcagacagctccac<br>aagcacagcctaactggagctgagcagcctgagatctgaggacacggcctgtatt<br>actgtgcgagagg          | C1 |
| VH4.37 | IGHV4-4*07 F  | 90.0 | cagctgcagctcaggagctggggccaggactggtgaagcctcggagaccctgtc<br>tgtcactcgtctgtctcgttggctctatcagcagtagctactggagctggatccgc<br>aggccccagggaaagggactggagtggttgggtatctatgtagtgtagtagca<br>ccaactcaacccccctcaagagctcagctcaccctcagtagacacgctcaag<br>aacagctctcctgaagctgagctctgtgaccgccggacacggcctgtattac<br>tgtgcgagcga             | C1 |
| VH4.38 | IGHV4-39*07 F | 90.1 | caggtgcagctcaggagctggggccaggactggtgaagcctcggagaccctgt<br>ccctcactcgtctgtctcgttggctccatcagcagtagtaactggtgagctggatc<br>cgcaacccccagggaaagggctggagtggttgggaatctatgtagtagtagc<br>gagcactctacaacccccctcaagagctcagctcaccattcaaaagacagct<br>ccaagaaccagttctcctgaagctgagctctgtgaccgccggacacggcctgt<br>attactgtgcgagaga         | C1 |
| VH4.39 | IGHV4-4*07 F  | 91.6 | caggtgcagctcaggagctggggccaggactggtgaagcctcggagaccctgt<br>ccctcactcgtctgtctcgttggctccatcagcagtagtaactggtgagctggatc<br>cgccagccccagggaaagggactggagtggttgggtatctatgtagtagtagc<br>gagcaccactcaacccccctcaagagctcagctcaccattcaaaagacagct<br>ccaagaaccagttctcctgaagctgagctctgtgaccgccggacacggcctgt<br>attactgtgcgagaga        | C1 |
| VH4.40 | IGHV4-39*07 F | 91.1 | caggtgcagctcaggagctggggccaggactggtgaagcctcggagaccctgt<br>ccctcactcgtctgtctcgttggctctatcagcagtagtaactggtgagctggatc<br>cgccagccccagggaaagggctggagtggttgggaatctcgttggtagtagt<br>gtagcactctacaacccccctcaagagctcagctcaccattcaaaagacagct<br>ccaagaaccagttctcctgaagctgagctctgtgaccgccggacacggcctgt<br>tattactgtgcgagaga       | C1 |
| VH3.41 | IGHV3-h*01 P  | 91.6 | gaggtgcagctggtggagctggtggggcggtggtaaagcctggggggccctga<br>gactctcctgcgcagcctcgtgattcaactcagtagctactacactgactggctcgc<br>caggctccagggaaagggctggagtggttctcagttattgtaatgggtggtagc<br>acatgtgacgagactcctgtgaagggcagattccacctccagagagaaccca<br>agaacacactgtatttcaaatgacagcctgagagctgaggacacggcctgtclatta<br>ctgtgcgagaga      | C1 |
| VH3.42 | IGHV3-22*02 P | 88.1 | gaggtgcagctggtgaaactggcggaggctggtgaagcctggggggccctgag<br>gactctcctgtgcagactcgtgattcaactcagtagcactacatgagtggtccgc<br>caggctccagggaaagggctggagtggttggatgaatgaaacaaagctgatg<br>gtgagacaacagactatctgcatctgtgaaagggcagattccacctccagagatg<br>attcgaaagcactacactctcgaatgaacaaactgaaacccagggacacggcgc<br>cgtgtattactgtgcgaggaa | C1 |
| VH4.43 | IGHV4-39*07 F | 90.4 | cagctgcagctcaggagctggggccaggactggtgaagcctcggagaccctgtc<br>cctcactcgtctgtctcgttggctccatcagcagtagtaactggtgagctggatcc<br>gccagccccagggaaagggactggagtggttgggtatctctgttagtggtggg<br>agcaccagcgacaacccccctcaagagctcagctcaccattcaaaagacagct<br>ccaagaaccagttctcctgaagctgagctctgtgaccgccggacacggcctgt<br>attactgtgcgagaaa      | C1 |
| VH3.44 | IGHV3-33*01 F | 93.1 | gaggtgcagctggtggagctggtggggaggctggtcagcctggggggccctgag<br>actctcctgtgcagcctcggattcaactcagtagctatgcatgcaactgggtccgc<br>aggctccagggaaagggctggagtggttgggtatattgtagtagtgaagtaag<br>aaatactcagcagactctgtgaagggcagattccacctccagagacaactccaa<br>gaaactgctatctcaaatgaacaaactgaaatggaggacacggcctgtattac<br>tgtgcgagaga          | C1 |
| VH3.45 | IGHV3-52*01 P | 92.0 | gaggtgcagctggtggagctggtggggaggctggtgacagcctggggggccctgag<br>actctcctgtacagcctcgtgattcaactcagtagcaccagataaactggtaccga<br>cagctccagggaaagggctggagtggttggcagataaagtaacagatggaagtg<br>agaaatactatgtagactctgtgaagggccgattcaactctccagagacaactgcca<br>agaaactcctctatcgaatgaacagcctgagagctgaggacacagcctgtatt<br>actgtgcgagaga  | C1 |
| VH5.46 | IGHV5-51*01 F | 95.1 | gaggtgcagctggtgagctggagcagaggtgaaagggccggggagctctgga                                                                                                                                                                                                                                                                   | C1 |

|        |               |       |                                                                                                                                                                                                                                                                                                                     |     |
|--------|---------------|-------|---------------------------------------------------------------------------------------------------------------------------------------------------------------------------------------------------------------------------------------------------------------------------------------------------------------------|-----|
|        |               |       | agatctcctgtaagactctggatacagcttaccagcagctggatcagctgggtgcg<br>ccagatgccgggaaaggcctggagtgaggggagcatctatcctgggtctgta<br>taccaaatacaaccgctcctcaaggccacgtcaatctcagccgcaagtcacat<br>cagccaccactcctcagctggagcagcctgaaggcctggaccaccgccaagctat<br>tactgtgcgaaagt                                                              |     |
| VH3.47 | IGHV3-72*01 F | 95.9  | gaggtgcaagctggtagctggtggggcgctggcacagcctgggggtccctgag<br>actctcctgtgacgctctggattcacctcagtgaccactacatggaactgggtccgc<br>aggctccagggaaggcctggagtggtgacccgtatgaaacaaagtcaacag<br>ttacaacaagaalacgcgcgtctggaaggcagattccatctcaagggatg<br>attcaaaagaacactgtatctgcaaatgagcagcctgaaaacccgaggaacagcgc<br>tgtattactgtctagaga   | C1  |
| VH3.48 | IGHV3-48*04 F | 91.0  | gaggtgcaagctggtagctggtggggaggctggccagcctggcggtccctgag<br>gctctcctgtgcaacctctggattcacctcagtaactactggatgtctgggtcccca<br>ggctccagggaaggcctggagtggtctcaagtattagtgtagcagtagtagca<br>catactaccagactctgcaaggccgattaccatctccagagacaacccaag<br>aacacgctgtatctgcaaatgaacagcccggagcggaggaacagcgtcttatta<br>ctgtgcgagaga        | C1  |
| VH3.49 | IGHV3-22*01 P | 88.4  | gaggtgcaagctggtagctggtggggaggctggcaacagcctgggggtccctga<br>gactctcctgtgattcacctcagtgaccactacatgagctgggtccgcaaggctcc<br>agggaaggccggcagtggtgagtttcatgagaacaaagttaagtgggaac<br>aacagaatacagcagctgtgaaaggcagattcactctcaagagctgattccaa<br>aagcattggccagctgcaaatgagcagcctgaaaacccgaggaacagcgcgtg<br>tactgtccagaag         | C1  |
| VH3.50 | IGHV3-48*04 F | 91.3  | gaggtgcaagctggtagctggtggggaggctggccagcctggcggtccctgag<br>actctcctgtgacgctctggattcacctcagtaactactggatgtctgggtcccca<br>ggctccagggaaggcctggagtggtctcaagtattagtgtagcagtagtagca<br>catactaccagactctgcaaggccgattaccatctccagagacaacccaag<br>aacacgctgtatctgcaaatgaacagcccggagcggaggaacagcgtcttatta<br>ctgtgcgagaga         | C1  |
| VH3.51 | IGHV3-48*04 F | 91.9  | gaggtgcaagctggtagctggtggggaggctggcaacagcctgggggtccctgag<br>actctcctgtgacgctccgattcacctcgggtaactctgactgtatctggatccgc<br>aggctccagggaaggcctggagtggtctcacaattagtggtgtagcatata<br>ctactcagactctgaaaggccgattaccatctccagagacaacccaagaa<br>cgctgtatctgcaaatgagcagcctgagagtgagggaacagcgcgtgattactgtg<br>caaaaga             | C1  |
| VH3.52 | IGHV3-h*01 P  | 91.6  | gaagtgcaagctggtagctggtggggaggctggtaacagcctgggggtccctgag<br>actctcctgtgacgctctggattcacctcagtgaccactacatgactgggtccgc<br>aggctccagggaaggcctggagtggtctcaagtattagcagtggtgtagta<br>ccattgtaccagactctgcaaggccgattaccatctccagagacaaccca<br>agaacacagctgtatctgcaaatgaacagcctgagagccgaggaacagcgtctat<br>tactgtgcgagaga        | C2  |
| VH1.53 | IGHV1-f*01 F  | 95.1  | gaggtcagctggtagctggtggggaggctggtaacagcctgggggtccctgaa<br>aatctcctgcaagcctctggatacactcaccgactactcctgactgggtcga<br>caggctcctggaaaggcctggagtggtggagcgtgtgactgcaagatgggtgaa<br>gcaatacagcagagaagttccaggaagagtcaccatccagcagcagcagctca<br>cagacacagcctacatggagctgagcagcctgagatctgagggaacagcgcgtgta<br>ttactgtgcaacaga     | C2  |
| VH3.54 | IGHV3-15*08 F | 91.2  | gaggtgcaagctggtagctggtggggaggctggccagcctggggatccctgag<br>actctcctgtgacgctctggattcacctcagtaactactggatgaactgggtccgc<br>aggctccagggaaggcctggagtggtggttattaaacaaagcagatgt<br>ggaaacagcagcatacggccaatctgaaaggcagattcactctcaagagatga<br>ttcaaaagaacacactgtactgcaaatgaacagcctgaaaacccgaggaacagcgc<br>cgtgtattactgtactagaga | C3  |
| VH3.55 | IGHV3-66*02 F | 87.4  | gaggtgcaagcgggtggagctggtggggaggctggcaacctgggggtccctga<br>gactctcctgtgacgctctgattcacctcagtagctcctggatgaactgggactc<br>caggctccaggaaggcctggagtggtctcacaattagtggtgtagcaca<br>gaclaccagattctcaaggcccaattcaccatctccagagacaatccagagac<br>catgctgtatgcaaatgaacagcctgagagctgaggacatggctgtgaattactgt<br>gcaagaga              | C4  |
| VH3.56 | IGHV3-48*04 F | 91.7  | gaggtgcaagctggtagctggtggggaggctggccagcctggcggtccctgag<br>actctcctgtgcaacctctggattcacctcagtaactactggatgactggtcccca<br>ggctccagggaaggcctggagtggtctcaagtattagtgtagcagtaglaaca<br>catactaccagactctgcaaggccgattaccatctccagagacaacccaag<br>aacacgctgtatctgcaaatgaacagcctgagagccgaggaacagcgtcttatta<br>ctgtgcgagaga        | C7  |
| VH4.57 | IGHV4-39*02 F | 92.1  | caggtgcaagctgaggagctggggaggctggtaacagcctgggagaccctgt<br>ccctcactgctgtctggtgctccatcagcagtggttactactgagctg<br>atccgcccagcccccagggaaggcctggagtggtgggtggtatctatglaaag<br>tgagagtaaccaactacaacccctccctcaagagctcaggtcaccattcaaaagaca<br>cgtccaagaacagctctcctgaaagctgagctctgtgaccgcccgggacagcggc<br>gtgtattactgtgagaga     | C8  |
| VH3.58 | IGHV3-66*02 F | 92.3  | gaggtgcaagctggtagctggtggggaggctggcaaacgctgggggtccctga<br>gactctcctgtgacgctctgattcacctcagtagctcctggatgaactgggtccgc<br>agactccagggaaggcctggagtggtctcagctattaatagtggtgggtgagc<br>acatactcagcagactcctgaaaggccgattaccatctccagagacaactcaaa<br>gaacacgctctcctgcaaatgaacagcctgagagctgaggacaacagcgtgtatt<br>actgtgtaaaaga    | C9  |
| VH1.59 | IGHV1-24*01 F | 95.14 | gaggtcagctggtagctggtggggaggctggtaacagcctgggggtccctgag<br>aggctcctgcaaggttccgatacactcaccgaattaccatgactgggtgca<br>caggccctgaaaggcctggagtggtggaggtgtgactctgatatgggtgaa<br>ataatacacgagagaagttccaggcagagtcaccatgaccagaggaacagctca<br>cagacacagcctacatggagctgagcagcctgagatctgaggacaacagcgcgtgta<br>ttactgtgcgaga         | C10 |
| VH3.60 | IGHV3-48*04 F | 90.88 | gaggtgcaagctggtagctggtggggaggctggccagcctgggggtccctgag<br>actctcctgtgacgctccggattcacctcgggtaactctgactgtgactggtccgc<br>aggctccagggaaggcctggagtggtctcacaattagtggtgtagcatata<br>ctactcagactctgcaaggccgattaccatctccagagacaacccaagaa<br>cagctgtatctgcaaatgagcagcctgagagtgagggaacagcgtgtattactgtg<br>aaaaga                | C11 |
| VH1.A  | IGHV1-8*02 F  | 85.07 | caggtcagctggtagctggtggggaggctggcaacagcctgggggtccctgaa<br>gctctcacaagcctctggttacccttccagcactatataaactgggtgagac<br>aggccctgaaacagctgctgactggatggatgattaaccttagcaatgtaata                                                                                                                                              | C1  |

|  |  |  |                                                                                                                                   |  |
|--|--|--|-----------------------------------------------------------------------------------------------------------------------------------|--|
|  |  |  | caggctacgcacagaagtccagggcagagtcacatgaccagggacacgtcca<br>caagcacagcctacatggagctgaacagcctgagatctgaggacacggcgtgtatt<br>actgtcggagaga |  |
|--|--|--|-----------------------------------------------------------------------------------------------------------------------------------|--|

<sup>a</sup>VH Open reading frames (ORFs) were annotated based on gene family usage and position relative to the junction between the V and D regions, with the most proximal gene segment receiving number 1 (e.g. VH6.1 correspond to family 6, VH ORF number 1 from the V-D junction). Since the locations of the contigs in the chromosome were unknown they were annotated as if following after the assembled genomic chromosomal sequence. F indicates functional. P indicates pseudogene. Annotations were given a dot (.) between the V family name and the family member gene number instead of a dash (-), as in the annotations for human Ab genes, to minimize confusion with the final annotations of the rhesus Ig loci that will be possible to do when a complete genome assembly is available.

<sup>b</sup>Closest matching human germline VH gene was determined via IMGT/V-Quest

<sup>c</sup>Homology (%) between the rhesus and closest matching human germline as determined by IMGT/V-Quest or AlignX

<sup>d</sup>Raw sequences are available via [www.ensembl.org](http://www.ensembl.org)

Sequences were extracted from genome assembly: MMUL 1.0, Feb 2006, database v. 66.10  
Ch7 corresponds to chromosome 7 region: 169,100,000-169,801,366.

C1 corresponds to contig MMUL: 1099548049584

C2 corresponds to contig MMUL: 1099214726682

C3 corresponds to contig MMUL: 1099214740059

C4 corresponds to contig MMUL: 1099214735892

C6 corresponds to contig MMUL: 1099214757507 (region spanning VH3.5 in Ch7)

C7 corresponds to contig MMUL: 1099214739418

C8 corresponds to contig MMUL: 1099214811615

C9 corresponds to contig MMUL: 1099214148171

C10 corresponds to contig MMUL: 1099214764051

C11 corresponds to contig MMUL: 1099214792373

**Table S2. Lambda germline gene analysis and annotation**

| Sequence ID <sup>a</sup> | Closest corresponding human IGLV gene <sup>b</sup> | Homology (%) <sup>c</sup> | Sequence                                                                                                                                                                                                                                                                                                                | Genomic location <sup>d</sup> |
|--------------------------|----------------------------------------------------|---------------------------|-------------------------------------------------------------------------------------------------------------------------------------------------------------------------------------------------------------------------------------------------------------------------------------------------------------------------|-------------------------------|
| VL3.1                    | IGLV3-1*01 F                                       | 87.8                      | tcctatgagctgactcagcccccctcagtgctcagtgccccaggacagccagccagcatcacctgc<br>ctggagataaattgggaatgcalatgcttactggtaccagcagaagccagggcctccctgta<br>ctggatcatalaataaaatgcaaccggccctcaggatccctgagcgattctcggctccaactcg<br>gggaacacggccaccctgacatcagcggggctgaggctggggatgaggccgactattactgt<br>gctacaagctatggcag                         | Ch10                          |
| VL4.2                    | IGLV4-3*01 F                                       | 91.2                      | ctgcctgtgctgactcagccccctgctcctgctgggacctctgcaagctcacctgcac<br>cctgagcagtgagcagcagaactcttattttctggtatcaacagagaccggggaggctccccg<br>gtalataatgaaggttaacagtgatggcaccagagcaaggggagggatccccgatcctct<br>tgggtccagctcggggctgacgctaccctaccatccaacctccagctgacgacagggctg<br>agttactgtggagagtgccacagattgatggccagctacgtt             | Ch10                          |
| VL2.3                    | IGLV2-14*01 F                                      | 95.0                      | caggctgcccctgactcagctccctctgctgctgggtctcctggacagctggctaccatctcgtcact<br>ggaaccagcagtgacattgggtgataaccgtgctcctggtaccacagcaccagggcaaaag<br>ccccaaactcagttatgaggtcagtaagcggccctcagggtctctgatcgtctctggtcc<br>aagtctggcaacacggcctcctgaccatctctgggtccaggctgaggacagggctgatttac<br>tgacgtcatalcga                               | Ch10                          |
| VL3.4                    | IGLV3-10*01 F                                      | 96.8                      | tcctatgagctgacacagcccccctcgggtcagtgctcccaggacagacggccaggatcacct<br>gctctggagatgattgcaaaaaaatgcttattgttccagcagaagccagggcctccctg<br>tctgatcattgagcagcaaacggccctcgggtcctggagagattctcgtccagctc<br>agggacagtgccaccctgactatcagtgggggccagggtggagatgaagctgactactactgt<br>actcaacagatgacagtgtaacatag                             | Ch10                          |
| VL2.5                    | IGLV2-23*02 F                                      | 93.1                      | caggctgccccgactcagctccctctgctgctgggtctgctggacagctggctaccatctcctgac<br>tggaaaccagcagtgatattgggtattataatgctgctggttaccacagatccagggcaaaagcc<br>cccaaaactcagttatgaggtcagtaagcggccctcagggtctctgatcgtctctggtccaa<br>gtctggcaacacggcctcctgaccatctctgggtccaggctgaggacagggctgattactg<br>cagctcatgacaggtatggtacttct                | Ch10                          |
| VL3.6                    | IGLV3-9*01 F                                       | 83.1                      | ttctgtaactgacacagtcaccctcagtgctcagtgggccccaggacagatgaccaggatcacctgt<br>gaagaagaatcattggaagtaaaagtctcaatggtaccggcagaagccagggccagggccg<br>gtttggctcattctgggatalagcaggcggcctcaggaatctgagagattctcggctccaact<br>ggagaacacagccaaacctgaccatcaacagggccaggctggggatgaggctattactgtaag<br>atgtgggacatt                              | Ch10                          |
| VL2.7                    | IGLV2-8*01 F                                       | 96.1                      | caggctgcccctgactcagctccctcaatgctcgggtctcctggacagctggctaccatctcctgca<br>ctggaaaccagcagtgacattgggtgataaccgtctcctggtaccacagcaccagggcaaa<br>gccccaaactcagttatgaggtcagtaagcggccctcagggtctctgatcgtctctggtcc<br>caagtctggcaacacggcctcctgaccatctctgggtccaggctgaggatgaggctgattata<br>ctgcagctcatatgca                            | Ch10                          |
| VL3.8                    | IGLV3-21*02 F                                      | 93.8                      | tcctatgagctgactcagcccccctcgggtcagtcggcctcaggacagacggccaggatcacct<br>gtggggagacaaactggaagtaaaatgctcactggtaccagcagaagccagggcagggcc<br>cctgtgctgctatctatgctatagcaaacggccctcagggtaccctgagcgattctcgtgctca<br>ctcagggaaacacggccaccctgaccatcagcaggggtgagggccgggagaggctgactatt<br>actgacaggtggtggacagt                          | Ch10                          |
| VL2.9                    | IGLV2-18*02 F                                      | 88.9                      | caggctgcccctgactcagctccctcagtgctcaagctcctggtcagctggctaccatctcctgctg<br>ctggaaaccagcagtgacattgggtgataaccgtctcctggtaccacagcaccagggcaaa<br>gccccagactcctgattaccgtgctcagtaacgaccctcagggtctctgatcgtctctggtcc<br>aagtctggcagcagcctccctgaccatctctgggtccaggctgaggacagggctattactg<br>ctgctcatata                                 | Ch10                          |
| VL3.10                   | IGLV3-19*01 F                                      | 95.7                      | ttctgagctgactcaggaacctcagtgctgctggcctgggacagacagctcaggatcactgtcc<br>aaggagacagcctcagaagctattatgcaagctggtaccagcagaagccagggccagggccct<br>gtcgtgctgctatgataaacaacacggccctcagggtaccctgagcgattctcgtgctcaagc<br>tcagaaacacagctcctcagaccatcagtggggtcagggtggaagatgaggctgactattactg<br>gactcctgggacagcagcggtaccatc               | Ch10                          |
| VL3.11                   | IGLV3-12*02 F                                      | 92.1                      | tcctatgatgactcagccacgctcagtgctgctgctcccaggacagacggccaggatcacctgt<br>gggggagacaacttggaaatgaaatgctcactggtaccagcagaagccagggcagggccct<br>gtcgtgctcattatagatagcaaacggccctcagggtaccctgagcgattctcgtgctcaact<br>cagggaacacggccaccctgaccatcagcggggctgagggccgggagtgaggctgactattact<br>gtcaggtggtggacagtagtagtcatcc                | Ch10                          |
| VL3.12                   | IGLV3-22*01 F                                      | 90.3                      | tcctatgagctgacacagcccccctgggtcagtgctcccaggacagacggccaggatcacctg<br>ctctggagatgactgaagaaaatattgctgactggtaccagcagaagccggccagggccct<br>gtgctgctgatacgaagatagtaagcagccctctggaatccctgagcgattctcgtgctcaact<br>caggggacacgcaaccctgaccatcagcagcaccctgagtgaagatgaggctgactattactg<br>ttttctgggaatgagaacaatcc                      | Ch10                          |
| VL2.13                   | IGLV2-11*01 F                                      | 95.8                      | caggctgcccctgactcagctcctcagtgctcgtgggtctcctggacagctggctaccatctcctgca<br>ctgaaaccagcagtgacatcgtggtgataactgtctcctggtaccacagcaccagggcaca<br>gccccaaactcagttatgaggtcagtaagcggccctcagggtctctgatcgtctctggtcc<br>caagtctggcaacacggcctcctgaccatctctgggtccaggctgaggacagggctgattata<br>ctgctgctcatatgacggcagctacacttcc            | Ch10                          |
| VL3.14                   | IGLV3-19*01 F                                      | 91.4                      | tcctgagctgactcaggaacctcagtgctgctggcctgggacatacagtcaggatgactgctcc<br>aaggagacagcctcaaacctattatgcaagctggtaccagcagaagccagggcagggccctg<br>tctgtgctcattatgtaaacactcggccctcagggtaccagcgattctctgctggctca<br>ggaaacacaggttctgaccatcactgctcaggtggaagatgaggctgactattactgtaac<br>tctgggacagcagcggtaccatct                          | Ch10                          |
| VL3.15                   | IGLV3-21*01 F                                      | 93.6                      | tcctatgagctgactcagcccccctcgggtcagtgctcccaggacagacggccaggatcacctg<br>tggggagacaaccttggaaatgaaatgctcactggtaccagcagaagccagggcagggcccc<br>tggctgctcattatgatagtgaccggccctcagggtaccctgagcgattctcgtcctcaact<br>agggaacaccggccaccctgaccatcagcggggctgagggccgggagtgaggctgactattactg<br>tcaggtggtggacagtagtagtcatcc                | Ch10                          |
| VL1.16                   | IGLV1-36*01 F                                      | 90.9                      | cagctgtgctgactcagctccctcagcgtcagggccggcaggaagagtgctaccatctcctgtt<br>ctgaaagcagctccaacatggaaatgaaatgctgctggtaccagcagctccaggaacagc<br>tccaacactcctcattatgatacgaagcctcaggtgctcctgacagattctcgtcctcaac<br>gtctggcaagcagctcctggccatcagtggtgctccagcagggatgaggctgattactg<br>cgacatgggagtagacgtgagcgtcc                          | Ch10                          |
| VL5.17                   | IGLV5-45*01 F                                      | 90.2                      | aagcctatgctgactcagccggcctcctcagcactcctggagatcagccagctcactatgc<br>accctcagcgggtgacatcaattgtgctgctaccatattctggtaccagcagaagccagggag<br>ctccccggtatctctgaggtcaaacactcagactcagataaaggccagggctctggagctccag<br>ccgtctctggtccaagaatgctcagcgaacacagggattttacgactctctgggtccagctg<br>aggatgaggtgactattactgtccattgggacagcagcgggtcct | Ch10                          |

|        |                 |      |                                                                                                                                                                                                                                                                                                                        |      |
|--------|-----------------|------|------------------------------------------------------------------------------------------------------------------------------------------------------------------------------------------------------------------------------------------------------------------------------------------------------------------------|------|
| VL1.18 | IGLV1-40*01 F   | 91.2 | cagctctgtgctgacagccgcccctcagctgtctggggccccagggcagagggtaaccatctctg<br>cactggagcagctccaacattggagttatgtatctctggtaccagcagctccaggaaca<br>cccccaaacctctcatatcaagataaagcgaccctcaggggttctgaccgattctctggctcc<br>aagctctggtacctcagctccctgaccatcagggctccagactgaggatgaggctgattact<br>gctctctatgacagcagcctgagtg                     | Ch10 |
| VL1.19 | IGLV1-50*01 ORF | 89.8 | cagctctgtgctgacagccgcccctcagctgtctggggccccagggcagagggtaaccatctctg<br>cactggagcagctccaacattggagttatgtatctctggtaccagcagctccaggaaca<br>cccccaaacctctcatatgacaataaagcgaccctcaggggttctgaccgattctctgctcc<br>aagctctggtacctcagctccctgaccatcagggctccagcctgggatgaggctgattact<br>gaggagcatgggatagcagcctgagtgctca                 | Ch10 |
| VL1.20 | IGLV1-51*02 F   | 93.5 | Cagctctgtgctgacagccgcccctcagctgtctggggccccagggcagagggtaaccatctctg<br>cctggaaagcagctccaacatcgggagaaattgtatctctggtaccagcagctccaggaaca<br>gcccccaaacctctcatatcaagataaagcgaccctcaggggttctgaccgattctctgct<br>cgaagctctggtacctcagctccctggccatcac (partial sequence)                                                          | Ch10 |
| VL7.21 | IGLV7-43*01 F   | 92.7 | caggctgtgtagtactcaggagccctcactgactgtctccaggaggagcagctactctcacctg<br>ctctcagcagctggagcagctcaccagtggtactctccacactggtccagcagaagcctggcc<br>aagccccagggactgattataatacaagctcaaacactctgactctgcccgttctcag<br>gctccctctggggcaaaagctcgcctgatactgacaggtgcacagcctgaggcagaggtgag<br>tattactgtgctgactatagtggtctcag                   | Ch10 |
| VL1.22 | IGLV1-47*02 F   | 95.1 | cagctctgtgctgactcaaccacctcagctctggggccccagggcagagtgctaccatctctgt<br>ctggaagcagctccaacatcgggagaaattgtatctctggtaccagcagctcaggaaagggc<br>cccaaacctctataataatacaagcagccctcaggggtccctgactctctggctcca<br>agctctgcaagctcagctccctggccatcagtggtccagctccagggatgaggctgattactg<br>cagcagctgggatagcagcctgagcgttc                    | Ch10 |
| VL5.23 | IGLV5-48*01 ORF | 91.2 | cagcctgtgctgactcagccaaacctcctctcagcactctctggagcatcagctcagctcactgc<br>acctcagcagctggcagctcagtggtggctcaatatacactggtaccagcagaagcaggag<br>tctccccgtactctgtaactactcagactcaaaagggcagggctctggagctccag<br>ccctctctggatccaaagatgctccgccaatgagggtttactctctggttccagctgga<br>ggtagggctgactattactgtaactggtgcaacaactgctct            | Ch10 |
| VL7.24 | IGLV7-43*01 F   | 92.7 | caggctgtgtagtactcaggagccctcaatgactgtctccagggaggagcagctactctcacctg<br>ctctccagcagctggagcagctcaccagtggtcactctccactggttccagcagaacctggaca<br>agcccccaagcactgattataatacaaacactcctgactctctgcccgggtctcag<br>ctccctctgggggaaagctgcccctgacactgctgagctgagcagcctgaggataaggtgag<br>tattactgctgctgactatagtggtctcag                  | Ch10 |
| VL1.25 | IGLV1-44*01 F   | 93.7 | cagctctgtgctgactcagccacctcagctctggggccccagggcagagtgctaccatctctgt<br>ctggaagcagctccaacatcagaggtatgggtgtaactggtaccagcagctcaggaaagggc<br>cccccaaacctctcatataataatacagcagccctcaggggtccctgaccgattctctgctcc<br>aagctctggcactcagctccctggccatcactggtctccagctgaggatgaggcagattact<br>cgaagcagtggaataacagcctgagcgttc              | Ch10 |
| VL7.26 | IGLV7-43*01 F   | 91.3 | caggctgtgtagtactcaggagccctcactgactgtctccaggaggagcagctactctcacctg<br>ctctccagcagctggagcagctcaccagtggtcacttccactggttccagcagaacctggaca<br>agcccccaagcactgattatgatacaagcaaacctctctggaccctgcccgttctcag<br>gctccctgtctgggtaagctcctcagcacttctgggtgagcagccccagggagcagctgag<br>tattactgctggctgactcagtggtgctcag                  | Ch10 |
| VL1.27 | IGLV1-47*02 F   | 94.7 | cagctctgtgctgactcagccacctcagctctggggctccgggagagtgctaccatctctgt<br>ctggaagcagctccaacatggaagtaattgtatctggtaccagcagctccaggaagcggcc<br>ccccaaactctcatatagtaatacagcagccctcaggggtccctgaccgattctctgctctaa<br>ctgtggcaactcagctccctggccatcactggtctccgactgaggatgagggtgattactgtg<br>cagcagtggaataacagcctgagcagcttc                | Ch10 |
| VL5.28 | IGLV5-48*01 ORF | 93.8 | cagcctgtgctgactcagccaaacctcctctcagcactctctggagcatcagcagactcactgc<br>acctcgcagctggcactcagtggtgtagttacaggatattctggtaccagcagaagcaggag<br>ctcccccgtatcttgaactcaccacagactcagataagcaccagggatctggagctccag<br>ccgctctctggatccaaagatgctccggccaatgagggtttactcactctgggctcagctga<br>ggtagggctgactattactgattggtggcaacaactgctct      | Ch10 |
| VL9.29 | IGLV9-49*01 F   | 94.3 | cagcctgtgctgactcagccaaacctcctctcagcactctctggagcatcagcagactcactgc<br>acctcagtagcggctcagtaattatgctggactggtcaccagcagaagcagggaagggc<br>cctcagttgtgctgagtgggcagcaggtgggattggggtccaaggggagtggaactcctgat<br>cctctcagctcgggctccggcctgaaatcgttaccctgacctcaagaacattcaggaagagga<br>tgagagtgactcactctggggcagaccagcctggggagcagctctg | Ch10 |
| VL1.30 | IGLV1-40*01 F   | 91.9 | cagctctgtgctgacagccgcccctcagctgtctggggccccagggcagagggtaaccatctctg<br>cactggagcagctccaacattggagttatgtgctggtaccagcagctccaggaacgg<br>cccccaaacctctcatataaataaagcgaccctcaggggttctgactgattctctgctcc<br>cagctctgtaacctcagctccctgaccatcactgactcagctgaggatgaggctgattactg<br>ccagctctatgacagcagctgagtg                          | Ch10 |
| VL1.31 | IGLV1-41*01 ORF | 90.5 | cagctctgtgctgacagccgcccctcagctgtctggggccccagggcagagggtaaccatctctg<br>ctctggaagcagctccaactcaggagttatgtgctggtaccagcagctccagggagcagc<br>cccccaaacctctcatatgattataaagcgaccctcaggggttctgaccgattctctgctcc<br>agctctggcactcagccctgggatcagtgactcggcctgaggatgaggcagattact<br>gctcagcagtggtatagcagcctgag                         | Ch10 |
| VL5.32 | IGLV5-39*01 F   | 90.2 | cagcctgtgctgactcagccagcctcctctcagcactctctggagcatcagcagctcactgc<br>acctcagtggtggcaccatgttgggtgactcactatacactggtaccagcagaagcaggggag<br>tctccccgtatctctgaaagtaacaactcagactcagataagcaccagggctctggagctccag<br>tgctctctggatccaaagatgctcagcagaacagggatttaccgactctgggctccagctg<br>aggatgagctgactattactgctcattggcagcagcagctct   | Ch10 |
| VL7.33 | IGLV7-46*01 F   | 92.0 | caggctgtgtagtactcaggagccctcactgactgtctccaggaggagcagctactctcactgt<br>ggctccagctctggagcagctcaggggacttattctccactggttccagcagaagcctggccaa<br>gccccagaacaactgattatgatacaagcaaacagctctctggaacccctgcccgttctcagc<br>tccctctggggtaaaagctcctcagcactgctgagctgagcagctgaggatgaggctgagat<br>tactgtgctgactatagtggtgctc                 | Ch10 |
| VL6.34 | IGLV6-57*01 F   | 92.7 | ccccattgtctggggctcggggcagacggctccatctctgaccaccagcagtgggcag<br>cattgacaacagctatgltactggtaccagcagcggccggcagcggccccaccactgtagct<br>acaatgatgccaagacccctgggtccctgactcggctctctggctccatgacagcctccca<br>actctgctccctcaactctctgactgaaagctgaggagcagggctgactattactgctgattatg<br>acagcagc                                         | Ch10 |
| VL5.35 | IGLV5-52*01 F   | 94.1 | cagcctgtgctgactcagccatctccatctcctgctgagcggcagcagactcactgc<br>acgtgagcagtggtcactcagtggtgactctgatacgtggtaccacaacaagcaggag<br>ccctccccgtatctctgtaactcactcagactcagataagcacaaggctctggagctccag<br>ccctctctggatccaatgatgcatcagccaatgagggttctgcatatctctggctccagcctg<br>aggatgagctgactattactgtgactcagctggcactgcaactcaagactca    | Ch10 |
| VL4.36 | IGLV4-69*01 F   | 95.9 | cagcctgtgctgactcagccctcctcctgctcctccctgggagcctcggtaagctcactgca<br>ctgagcagtgggcagcagcagctcagcactcagctggtcagcagcagcagcaagggagggc<br>cctgactctaatgagcctaacagctatgacagccacagcaagggggagggatcctctgac                                                                                                                        | Ch10 |

|         |                  |      |  |                                                                                                                                                                                                                                                                                                                    |                 |
|---------|------------------|------|--|--------------------------------------------------------------------------------------------------------------------------------------------------------------------------------------------------------------------------------------------------------------------------------------------------------------------|-----------------|
|         |                  |      |  | gcttcaggctccagctccgggctgagcgtacctccacctccaacctccagctgaggatgaggctgattactgctcagaccctggatactggcattca                                                                                                                                                                                                                  |                 |
| VL1.37  | IGLV1-40*01 F    | 78.8 |  | cagctgtgctgactcagccaccctcagtgctgggcccacagggccaggctcactatctctgca ttggaagcagctcactggtcagctggtataatgtaaaactgttgccagtggtcccaagaactga tcccaaaactctcagtgtaataagaaactgggctcctgggcatcagcaaatctctgctcc aagtctggcaactggctccctggccaccactggctctggactgaggacagactgagatca ctccagctccacggcagcagcagtgct                             | Ch10            |
| VL5.38  | IGLV5-45*01 F    | 80.1 |  | cagcctgtgctgactcagccctcctctctgctatcaggagcatcagccagactcctgc accctgagcagtggtcagtgctgactctctggtataactggataaccagataagccagggagc cctccccgtatctcctgagcctcaccaaaattcattcatgacctggctccgggtccccagggc gcatctctggtatggaagactggtccaaataaaggctctgctcactatctgctccagcctgag gatggcctgactattactglatgattgagcagggcagagctct             | Ch10            |
| VL6.39  | IGLV6-57*01 F    | 91.6 |  | ccccattctgtgctggggtctccggggcagacgggtaccatctctgaccocgcagctggcag cactgacagtaataatgtcagtggtaccagcagcccccggcaatgcccccaccagtgattt acaaaataacaaagaccctcgggtccctgactggttctctggtccattgacagctcctcca actctgctccctgctcactctgggctaaagtctgaggacgaggctgactactctgctgctgct gatggcagc                                               | Ch10            |
| VL6.40  | IGLV6-57*01 F    | 92.7 |  | ccccattctgtgctggggtctccggggcagacgggtaccatctctgaccocgcagctggcag cactgacagtaataatgtcagtggtaccagcagcccccggcagtgccccaccagtgattt acaaaataacaaagaccctcgggtccctgactggttctctggtccattgacagctcctcca actctgctccctgctcactctgggctaaagtctgaggacgaggctgactactctgctgctgct gatggcagc                                                | Ch10            |
| VL10.41 | IGLV10-54*01 F   | 95.4 |  | caggcagggtgactcagccaccctcagtgccaagggttgagacagacggccacgctcacc tgcactgagaagtagtgctcagtggtaccagcagcccccggcagtgccccaccagtgattt acaaaataacaaagaccctcgggtccctgactggttctctggtccattgacagctcctcca actctgctccctgctcactctgggctaaagtctgaggacgaggctgactactctgctgctgct gatggcagc                                                 | Ch10            |
| VL11.42 | IGLV11-55*01 ORF | 94.8 |  | cagcctgtgctgactcagccaccctcctctgctgctcctccgggagcagctggccagactcccctgc accctgagaagtagtgctcagtggtgtaaaaaactgtaactgctgacagcagaagccaggga ggcctccaggttattctgctactactcctcagcagcaagcagctgggacctgggtccccca atcagctctggtcccaaggagcctcaagtaacacagcgttttctgctcactctgggtccagcct gaggacgaggccgattattactgctcaggtgtagcagctgctgctaat | Ch10            |
| VL8.43  | IGLV8-61*01 F    | 94.8 |  | gagactgtgggtagccaggagccatggtgctgactgactcctggaggaaacagtcacactcactg tggctgagctggtcagctcctcaccagtaactccccagctggtaccagcagacccccaggcc aggtcccaagcagcctcactcagcacaacacctcctctggggtccctgctgctctctggt cctcacttgggaaacaaagctcctcaccatcagggggctcaggcagcagtgatgattctgattt actctgactcctcactggtgtagtggcatttc                    | Ch10            |
| VL2.44  | IGLV2-11*01 F    | 92.0 |  | cagctgcccctgactcagccctcctcagtgccaagtctctggacagctgggtccacctctgctc ac tggaaaccagcagtgactggtgtataatgactctcctggtaccagcagccccaggccacag cccccagactcctgattatgactgaagacggccctcagggtctctgctgctctctgctcc aagtctggcaacacggcctcctgaccatctgggtccaggctgaggacgaggctgattattac tgcctcactatagggtaggaagcatttc                         | CAL:175-471     |
| VL3.45  | IGLV3-27*01 F    | 92.5 |  | tcctatgactgactcagccaccctcctgctcagtgctccctggacagcagcccaagattcctgc tctggagatgactgcaaaaatattatgctcattggtaccagcagaagccaggccagcctctg ctgtgattataaagcagtgagagccctcaggatcctgagcagctctggtccacgtca gggaccagtcaccctgaccatcagcggggccagggtgaggatgaggctgactactgctt actctgggtagcaacaact                                          | CCL:5110-5393   |
| VL3.46  | IGLV3-21*01 F    | 93.2 |  | tcctatgactgactcagccaccctcctgctcagtgctccctggacagcagcccaagattcctgc tctggagatgactgcaaaaatattatgctcattggtaccagcagaagccaggccagcctctg ctgtggtcactctgctgtagcgaacggcctcaggatcctgagcagctctgctgctcaca ctacgggaacacggcctcctgaccatcagcggggctgaggccgggtagggtgactatta ctgctcaggtgggacagtagtagtacc                                | CDL:227-516     |
| VL3.47  | IGLV3-21*02 F    | 92.1 |  | tcctatgactgactcagccaccctcctgctcagtgctccctggacagcagcccaagattcctgc tggggagacaacattggaagtgaagtgtaactggtaccagcagaagccacggcagggccct gtgctgctcactctgctgtagcgaacggcctcaggatcctgagcagctctgctgctcaca ctacgggaacacggcctcctgaccatcagcggggctgaggccgggtagggtgactattact gtacaggtgggacagtagtagtacc                                | CEL:20227-20516 |
| VL3.48  | IGLV3-19*01 F    | 90.7 |  | tcctcgggctgactcagggcctgctgctgctggcctgggacacagtcaggatgactgccc aaggagacagcctcaaaaactattatgcaagctggtaccagcagaagccaggccaggtccctg tctgctcactctggtataaagcagtgagagggcctcaggatcctgagcagctctgctgctcaga ggaacaacaggtcctgaccatcactgctcaggtggaagtagggtgactattactgtaac tctgggacagcagcagtagcctcc                                 | CEL:27670-27959 |
| VL3.49  | IGLV3-25*02 F    | 93.9 |  | tcctatgactgactcagccaccctcctgctcagtgctccctggacagcagcccaagattcctgc tctggagaataactcggcaaaaaatgctcagtggttcacagcagaagccaggccagggccc ctgctggtgtagatataaagcagtgagagggcctcaggatcctgagcagctctgctgctcaga gttcagggaacacagttactgaccatcagtgggggccaggcagaagtagggtgactattac tgcactcagcagcagcagtggtatcctc                          | CFL:1449-1738   |
| VL2.50  | IGLV2-18*02 F    | 92.0 |  | cagctgcccctgactcagccctcctcagtgccaagtctctggacagctgggtccacctctgctc ac tggaaaccagcagtgactggtgtataatgactctcctggtaccagcagccccaggccacag cccccagactcctgattatgaggtcagtaagcggccctcagggtctctgactcctctggtccc aagtctggcaacacggcctcctgaccatctctgggtccaggctgaggacgaggctgattattac tgcctcactatagggtaggaagcatttc                    | CGL:8640-8936   |
| JL1     | IGLJ1*01         | 81.6 |  | ttacatctcgggtctgggaccggctcaccgtcctag                                                                                                                                                                                                                                                                               | Ch10            |
| CL1     | IGLC1*01         | 92.6 |  | cccaaggctccccacggctcactctgctccgccctcctctgaggagctccaagcaaaacagggc cacactagtgctgactcagtgactctccccgggagctggaagtgccctggaggcagctgagg cagcgtctcaatggggtagtgagaccaccgcccctcaaacagagcaacaacaagattg cagccagcagctactgagcctgactcctgaccagtggaagtcacaagagctcagctgccc aggtcaccgacgaaggagcagctgggagaagcagtgggccctcgagaattgta      | Ch10            |
| JL2     | IGLJ2*01         | 84.2 |  | tggtattcggaggagggaccggctgaccgtcctag                                                                                                                                                                                                                                                                                | Ch10            |
| CL2     | IGLC2*01         | 92.7 |  | cagcccaaggctccccctgctcactctctcccgcctcctctgaggagcttaagccaacaag gccacaactagtgctgactcagtgactctccccgggagcgtggaaagtgccctggaggcagga tggcagcagtcacacggggagtgagaccaccaaacctcaaacagagcaacaaca (partial sequence)                                                                                                            | Ch10            |
| JL3     | IGLJ3*01         | 89.5 |  | tgtgtattcggaggagggaccggctgaccgtcctag                                                                                                                                                                                                                                                                               | Ch10            |
| CL3     | IGLC3*01         | 92.1 |  | cagcccaaggctccccctgctcactctctcccgcctcctctgaggagcttaagccaacaag gccacaactagtgctgactcagtgactctccccgggagcgtggaaagtgccctggaggcaga tggcagcgtctcaacggggagtgagaccaccaaacctcaaacagagcaacaacaagt acggccagcagctactgactgactgctgaccagctggaagctcccaagagctacagct                                                                  | Ch10            |

|      |            |      |                                                                                                                                                                                                                                                                                                                                  |      |
|------|------------|------|----------------------------------------------------------------------------------------------------------------------------------------------------------------------------------------------------------------------------------------------------------------------------------------------------------------------------------|------|
|      |            |      | gccagggtcacgcacgaaggagcaccgtggagaagacagtgcccccgcagaatgtca                                                                                                                                                                                                                                                                        |      |
| JL4  | IGLJ4*01   | 84.2 | tttggattctgtggaggaccagctgaccattgtag                                                                                                                                                                                                                                                                                              | Ch10 |
| CL4P | IGLC4*01 P | 88.5 | ctggctactgagacacctcctcctgacccagaggcaggagttccaagacaagaccac<br>actggtatgtctcatgagtgacttctacctgagagccatgacagtgccctggaagctagatgacatc<br>tccatcacctagtgtagagaccaccacccctccaacagagcaacaaggctacctgagcct<br>gggcccagacagtggaagtcccacaacctctcatctgccaggtcacgcaggaagggaacacc<br>gtggaaaagacagtgcccccgcagcatgttct                           | Ch10 |
| JL5  | IGLJ5*01   | 86.8 | ttgggtgttcggcgaggggaccaagctgaccatcctag                                                                                                                                                                                                                                                                                           | Ch10 |
| CL5P | IGLC5*01 P | 86.4 | cagccacaaggccacccttggctactctgttcccacctcctctgaggagctccaagccaaca<br>ggccacactagtgctcataaalgccctctacccaggagccatgacagtgccctggaaggcag<br>atggcaccacagtcaccaagggcatggagacaagcaccctccaacagagcaacaagtat<br>gcggccagcagttacctaagcctgatgctgagcagtgaaagtcccccaagactaccgctcc<br>aggtcacacacgaagggaaccacctggagaagacagtgcccatgcagaatgttc       | Ch10 |
| JL6  | IGLJ6*01   | 92.1 | tgatgttgcggaagtgccaccaagttgaccgtcctcg                                                                                                                                                                                                                                                                                            | Ch10 |
| CL6  | IGLC6*01   | 94.3 | cagcccaaggctcccccttggctactctgttcccacctcctctgaggagctccaagccaaca<br>ggccacactagtgctcctgactgacttctacccgggagctgaaagtgccctggaaggcagat<br>ggcaactctgtcaacacgggagtgagaccaccacccctccaacagagcaacaacaagta<br>cggccagcagctactgagcctgacgtccgaccagtggaagtcccaagagctacagttg<br>ccaggtcacgcacgaaggagcaccctggagaagacagtgcccccctgcagaatgtca       | Ch10 |
| JL7  | IGLJ7*01   | -    | No NHP sequence was found                                                                                                                                                                                                                                                                                                        | -    |
| CL7  | IGLC7*01   | 91.4 | caccccaaggctcccccttggctactctgttcccacctcctctgaggagctccaagccaaca<br>ggccacactagtgctcctgactgacttctacccgggagccgtggaagtgccctggaaggcagat<br>ggagcccccgtcaacatgggagtgagaccaccacccctccaacagagcaacaacaagt<br>acggccagcagctaccctgagcctgacgtccgaccagtgagggtcccaacagctacagct<br>gccagggtcacgcacgaaggagcaccctggagaagacaatggcctgtgcagaatgtctct | Ch10 |

<sup>a</sup>Open reading frames (ORFs) were annotated based on gene family usage and position relative to the junction between the V and J regions, with the most proximal gene segment receiving number 1 (e.g VL1.30 correspond to family 1, VL ORF number 30 from the V-J junction, JL2 is the second J gene segment from the V-J junction). Since the locations of the contigs in the chromosome were unknown they were annotated as if following after the assembled chromosomal sequence. F indicates functional. P indicates pseudogene. Annotations were given a dot (.) between the V family name and the family member gene number instead of a dash (-), as in the annotations for human Ab genes, to minimize confusion with the final annotations of the rhesus Ig loci that will be possible to do when a complete genome assembly is available.

<sup>b</sup>Closest matching human germline VH gene was determined via IMGT/V-Quest. JL and CL gene segments were compared to allele \*01.

<sup>c</sup>Homology (%) between the rhesus and closest matching human germline as determined by IMGT/V-Quest or AlignX

<sup>d</sup>Raw sequences are available via [www.ensembl.org](http://www.ensembl.org)

Sequences were extracted from genome assembly: MMUL 1.0, Feb 2006, database v. 66.10

Ch10 corresponds to chromosome 10 region: 65,700,000-67,300,000.

CAL corresponds to contig MMUL:1099214728802

CCL corresponds to contig MMUL:1099214729065

CDL corresponds to contig MMUL:1099214790287

CEL corresponds to contig MMUL:1099548049764

CFL corresponds to contig MMUL:1099214733386

CGL corresponds to contig MMUL:1099214725231

**Table S3. Kappa germline gene analysis and annotation**

| Sequence ID <sup>a</sup> | Closest corresponding human IGKV gene <sup>b</sup> | Homology (%) <sup>c</sup> | Sequence                                                                                                                                                                                                                                                                                                         | Genomic location <sup>d</sup> |
|--------------------------|----------------------------------------------------|---------------------------|------------------------------------------------------------------------------------------------------------------------------------------------------------------------------------------------------------------------------------------------------------------------------------------------------------------|-------------------------------|
| VK4.1                    | IGKV4-1*01 F                                       | 94.9                      | Gacattgtagtaccagctccagactccctggctgtctctgggagagaggtccaccatcaac<br>tgcaagtcagccagagctctttatcacgctccaacaataagaactctagcctggtagccagcag<br>aaaccaggacaggtcctaaagctctcattatctgggcatctaccgggaatccgggctcctaa<br>ccgattcagtgccagtgatctgggtcagattcactctcaccatcagtgccctcaggctgaagat<br>gtggcagtgattactctcagcagattatagcactctc | Ch13:1                        |
| VK5.2                    | IGKV5-2*01 F                                       | 87.1                      | gaaatgatactcacacagctccggcattgtgtcagcagactccaggagacaaagtcaccatctcc<br>tcagagctggccaagacattgatgatgatgaactggatcaacaggaaaccaggagaagctc<br>tcaaacctatttaaagatgtaactctctctgtttggcaatcccaactcaattcagtgagtgga<br>tgggatagatttaccctgacaattaatagcatgaaatctgaggatactcatattactctgccaac<br>agagggataatcacctct                 | Ch13:1                        |
| VK3.3                    | IGKV3D-7*01 F                                      | 91.0                      | caagtataattgacacagctccagccaacctgtcttctccagggaagagccactctctctg<br>cagggccagtcagagctttagcagctactagcctggatccagcagaaaccctggcaggtccc<br>aggctctcattcaacagtgctccagcaggccactggcctccagacagagctcagtgccagc<br>ggctgggacagattcaccctcaccatcagcagcctggagcctgaagatgtggagttatcact<br>cctatcagattacagcgggtacc                    | Ch13:1                        |
| VK5.4                    | IGKV5-2*01 F                                       | 92.5                      | gaaacgatactcacacagctccggcattgtgtcagcagactccaggagacaaagtcaccatctc<br>ctcagagctggccaagacattgatgatgatgaactggatcaacaggaaaccaggagaagc<br>tccaactcatttaaagatgtaactctctctgtttggcaatcccaactcagttcagtgccagc<br>gtaggaaacagatttaccctcacaattaatagtaactcagagctgctcatattactctgtcta<br>caacatgataattccctct                     | Ch13:1                        |
| VK7.5                    | IGKV7-3*01 P                                       | 96.6                      | Gacattgtagtaccagctccagcctcttggcctgtctccaggcagagggccaccatcacc<br>tcagagccagtagagctgtcagttcttggaaataaacctcattcctgtgatcagcagaaaccag<br>gacaacctcctaaactctgtatttccaagctccaataaagacacaggggtccagcaggttc<br>agcggcagtggtctgggaccgatttcaacctcacaataatcctgtggaagctgacagctgca<br>gattatactctctcagagtaagaattctct            | Ch13:1                        |
| VK2.6                    | IGKV2-4*01 P                                       | 92.5                      | Gatattgtagtaccagcactcctcctctgctctccctctggacagccggcctcctctctg<br>caggtctagcagagctcctgatagtgaaagcaactattggatgtgactcagagaagcca<br>ggcagctccctcagctcttactcactcaattctcacaataatctatggagtcaccaagcagttcag<br>gcagcaggtcagggacaggtttcaacactcaatcagcaaggtggaggtgaggtgtggagtt<br>tattctgtgaaacagggctcgaaggtct               | Ch13:1                        |
| VK1.7                    | IGKV1-5*01 F                                       | 94.3                      | Gacattcagatgaccagctcctcctcctctgctgatctgtgggagacaaagtcaccatcact<br>gccaagcagtcagagattagcagctgtgtagcctgtgatcagcagaaaccagggaagccc<br>ctaagccctgatctataagcattcagttggaaagtggtgcccctcaagttcagcggcagtg<br>gatctgggacagattcactctcaccatcagcagcctcagcctgagatttgcacattactctgca<br>aacagtataacagtgccctcc                     | Ch13:1                        |
| VK1.8                    | IGKV1D-16*01 F                                     | 94.3                      | Gacattcagatgaccagctcctcctcctctgctgatctgtgggagacaaagtcaccatcact<br>gccaagcagtcagagattagcagctgtgtagcctgtgatcagcagaaaccagggaagcccct<br>aagcctctgatctatgctcagcattgcaaaagtggtgcccctcaagttcagcggcagtgga<br>tctgggacggattacactctcaccatcagcagcctcagcctgaagatttgcactattactctgca<br>acagatgatgactccctcc                    | Ch13:1                        |
| VK1.9                    | IGKV1-16*01 F                                      | 96.4                      | Gacattcagatgaccagctcctcctcctctgctgatctgtgggagacagagtcaccatcact<br>gtgggcaagtggtggcattagcagctgtttagcctgtgatcagcagaaaccagggaagcccct<br>aagcctctgatctatgctcagcattgcaaaagtggtgcccctcaagttcagcggcagtgga<br>ctgggacagattcactctcaccatcagcagcctcagcctgaagatttgcactattactctgca<br>cagataatagtaacctcc                      | Ch13:1                        |
| VK1.10                   | IGKV1D-42*01 ORF                                   | 90.3                      | Gacattcagatgaccagctcctcctcctctgctgatctgtgggagacagagtcaccatcact<br>gccaagcagtcagagattagcagctgtttagcctgtgatcagcagaaaccagggaagcccct<br>agctctctctatgctcaaaagattgtgactgggtctcctcagagttcagtgccaggggact<br>gggacagattcactctcaccatcagcagcctgagctgaagatttgcactattactctgcaac<br>aagttcagttaccctcc                         | Ch13:1                        |
| VK3.11                   | IGKV3D-15*01 F                                     | 93.9                      | Gaaatgtagtaccagctccagccaacctgtcttctccagggaagagccacctctc<br>ctcagggccagtcagagtgctcagcagcagcttagcctgtgatcagcagaaaccagggaagccc<br>tccaagctctcctatctatgtgctcagcagggccaccggcctccagcagggttcagtgga<br>gtggctcgggacagagttactctcaccatcagcagcctggagcctgaagatgtggatttact<br>tgtagcagggattatagctgcccctcc                     | Ch13:1                        |
| VK1.12                   | IGKV1-12*01 F                                      | 92.5                      | Gacattcagatgaccagctcctcctcctctgctgatctgtgggagacagagtcaccatcact<br>gccaagcagtcagggatcagcagctgtttagcctgtgatcagcagaaaccagggaagccc<br>ctaagctctctatagcagccctgttgcagaaagtggtgcccctcaagttcagtgccagtggt<br>atctgggacagattcactctcaccatcagcagcctcagcctgaatatttgcactattactctgca<br>acagtttagcagtgcccctcc                   | Ch13:1                        |
| VK1.13                   | IGKV1-17*01 F                                      | 94.6                      | Gacattcagatgaccagctcctcctcctctgctgatctgtgggagacagagtcaccatcact<br>gcccggcaagtcaggtattagcagttttaaattggttcagcagaaaccagggaagcccct<br>aagctctctgatctatgctcagcattggaagtggtgcccctcaagttcagcggcagtggtg<br>ctgggacagaaattcactctcaccatcagcagcctcagcctgaagatttgcactattactctgca<br>cagataaaagttac                           | Ch13:1                        |
| VK3.14                   | IGKV3-NL5*01 F                                     | 94.3                      | Gaaattgtagtaccagcactcctcagccaacctgttcttctccagggaagacagccacctctc<br>caggaccagtcagagtgtagcagctactagcctgtgatcagcagaaaccagggaagcccct<br>caggtctctcactatggtgctcagcagggcactgctcctccagacagagttcagtgccagc<br>ggctgggacagactcactctcaccatcagcagcctggagcctgaagatttgcagttattactctg<br>caggagactagtaact                       | Ch13:1                        |
| VK1.15                   | IGKV1-13*02 F                                      | 92.8                      | Gacattcagatgaccagctcctcctcctctgctgatctgtgggagacagagtcaccatcact<br>gcccggcaagtcagggcattagcagttttaaattggttcagcagaaaccagggaagcccct<br>aagctctctgatctatgctcaaacagttggcaagtaggtccctcaagttcagcggcagtggt<br>ctgggacagaaattcactctcaccatcagcagcctcagcctgaagatttgcactattactctgca<br>cagggtaalagtaac                        | Ch13:1                        |
| VK1.16                   | IGKV1-17*01 F                                      | 94.6                      | Gacattcagatgaccagctcctcctcctctgctgatctgtgggagacaaagtcaccatcact<br>gcccagcagtcagggcattagcagttttaaattggttcagcagaaaccagggaagcccct<br>ctaagctctctatgctcagcctcaatggcaagtggtgcccctcaagttcagcggcagtggt<br>atctgggacagattcactctcaccatcagcagcctcagcctgaagatttgcagttattactctgca<br>acagcgtlaatgtaacctcc                    | Ch13:1                        |
| VK2.17                   | IGKV2D-29*01 F                                     | 88.8                      | Gctgtgtagtaccagcctcctcctcctgctcctgctcctgagagccgtaactcctcctc<br>gcagacagtcagcagcccctcagataatgatacactatttgaattgggtctcagagaagc<br>caggccagctcctcagctcccgatttgggttccaacagggaaaccctggagttccagaaaggt<br>tcagtgccagtgtagtataaattcaggttcaaaatcaggagatggatctgagggatgtg<br>aggtctattgctccagcaaatgatacattattctcc            | Ch13:1                        |



|        |                  |      |                                                                                                                                                                                                                                                                                                           |        |
|--------|------------------|------|-----------------------------------------------------------------------------------------------------------------------------------------------------------------------------------------------------------------------------------------------------------------------------------------------------------|--------|
| VK3.18 | IGKV3D-7*01 F    | 94.3 | Gaaatgtaatgacgagctccagccaccctgtcttctccaggagaagagccaccctcc<br>tcaggcccaagtcagagtgtagcagcaacttagcctggatccagcagaaacctggcaagct<br>cccaggtccctcatgatgacalccaacaggccacgtgatccagacaggttcagtgccagct<br>gggtctgggacagattcactctccatcagcagcctggagcctgaagatgtggatttact<br>gtcagcaggagagtaactggcctc                    | Ch13:1 |
| VK1.19 | IGKV1-17*01 F    | 94.3 | Gacatccagatgaccagctccatctccctgtctgcatcgtaggagacagagtcaccatcact<br>tgaggcccaagtcaggccattagcagattattagcctggatcagcagaaaccaggaaagctcc<br>taagccctgatctatgctcagctcaggttgaaggtgggtccatcaaggttcagcggcagtg<br>atctgggacagaattcactctccatcagcagcctgagcctgaagatttgcagcttattctgtc<br>acagggttatagaccctcc              | Ch13:1 |
| VK1.20 | IGKV1-16*01 F    | 94.3 | Gacatccagatgaccagctccatctccctgtctgcatcgtaggagacagagtcaccatcact<br>gtcggccagtcaggccattagcagattattagcctggatcagcagaaaccaggaaagctcc<br>gaagccctgatctatgacatccaatttgaaggtgggtccatcaaggttcagcggcagtg<br>atctgggacagaattcactctccatcagcagcctgagcctgagagatttgcacttattctgtc<br>aacagtataacagtgaccctcc               | Ch13:1 |
| VK1.21 | IGKV1-9*01 F     | 95.0 | Gacattcagtgaccagctccatctccctgtctgcatcgtaggagacagagtcaccatcact<br>gtcgggcaagtcaggccattagcagattattagcctggatcagcagaaaccaggaaagctcc<br>aagctctgatctataaggcctccaggttgaaggtgggtccatcaaggttcagcggcagtgga<br>ctgggacagaattcactctccatcagcagcctgagcctgagagatttgcagtttattctgtc<br>acagcgtaatagttaccctcc              | Ch13:1 |
| VK2.22 | IGKV2D-29*01 F   | 87.4 | Gatactgtgagaccagcctccatctccctgcccaccactggagaaaccgggtccatctcc<br>tcaggcccaagtcaggccattagcagattattagcctggatcagcagaaaccaggaaagctcc<br>caggccagcctcagctccctgatttattgttttcaacaggaaccctggagtcaccaaaaggtt<br>cagggacagtgagtcacatgacacattcaggtttaaactcaggagagtgagctgagagcgtg<br>aggttattgtctgctccagcaagtcacattacc | Ch13:1 |
| VK3.23 | IGKV3D-7*01 F    | 91.0 | Gaaatgtaatgacgagctccagccaccctgtcttctccagggaacagccaccctctc<br>tcaggcccaagtcaggccattagcagattattagcctggatcagcagaaaccaggaaagctcc<br>caagctcctgtcatatgacatctcagggccactggatccagcagaggttcagtgccagcgg<br>gtctgagacagagttcactctccatcagcagcctgagcctgagagatttgcagtttattctgtc<br>agcgtataatgactgtccctcc               | Ch13:1 |
| VK1.24 | IGKV1D-13*01 F   | 94.3 | Gacatccagatgaccagctccatctccctgtctgcatcgtaggagacagagtcaccatcact<br>tcaggcccaagtcaggccattagcagattttaaattggatcagcagaaaccaggaaagctcc<br>taagctcctgatctatgctcagctcaggttgaaggtgaggtccatcaaggttcagtgccagtg<br>ctgggacagatttactctccatcagcagcctgagcctgagagatttgcacttatttgcac<br>cgtttaaattacc                      | Ch13:1 |
| VK3.25 | IGKV3D-15*01 F   | 96.4 | Gaaatgtagtgacgagctccagccaccctgtcttctccagggaacagccaccctctc<br>ctcaggcccaagtcaggccattagcagattttaaattggatcagcagaaaccaggaaagctcc<br>tccagcctcctcatctatgctcagctcaggttgaaggtgggtccatcaaggttcagtgccag<br>gtgggtctgggacagagttcactctccatcagcagcctgagcctgagagatttgcagtttatt<br>gtcagcagtagtaactgtccctcc             | Ch13:1 |
| VK1.26 | IGKV1-17*01 F    | 94.3 | Gacatccagatgaccagctccatctccctgtctgcatcgtaggagacagagtcaccatcact<br>tcaggcccaagtcaggccattagcagattttaaattggatcagcagaaaccaggaaagctcc<br>aagcctcctgatctatgctcagctcaggttgaaggtgggtccatcaaggttcagtgccagtg<br>ctgggacagatttactctccatcagcagcctgagcctgagagatttgcacttatttctgtc<br>agataaacagtgac                     | Ch13:1 |
| VK1.27 | IGKV1D-17*02 [F] | 94.3 | Gacatccagatgaccagctccatctccctgtctgcatcgtaggagacagagtcaccatcact<br>gtcgggctgtagcagaccattagcagattttagcctggatcagcagaaaccaggaaagctcc<br>agctcctgatctatgctcagctcaggttgaaggtgggtccatcaggttcagcggcagtgatc<br>tgggacagaattcactctccatcagcagcctgcaacctgaagatttgcacttattctgtcaac<br>agcatalatagtcaccctcc             | Ch13:1 |
| VK6.28 | IGKV6D-41*01 ORF | 95.3 | Gatattgtgtagtactcagctccagcctctgtctgtagtccaggggagaagtcaccatcact<br>gccagggcagtgaggccattagcaacttcaactgtaccagcagaaaccagatcaagccc<br>caagcctcctcatctatgctcagctcaggttgaaggtgggtccatcaaggttcagtgccagtg<br>atctgggacagatttactctccatcagcagcctggaaggtgagagctgcaacatttactgtca<br>gcaaggcaataagcaccctca              | Ch13:1 |
| VK1.29 | IGKV1-27*01 F    | 88.2 | Gacatccagatgaccagctccatctccctgtctgcatcgtaggagacagagtcaccatcact<br>tgccagggcaagtcagagcattagcaatttagcctggatcagcagaaaccaggaaagctcc<br>ctagcctcctgatctatgctcagctcaggttgaaggtgggtccatcaggttcagtgccagtg<br>gatctgggacagatttactctccatcagcagcctgagcctggaagatttgcagcttattctgtc<br>aacaggagtagcagctaccctcc          | Ch13:1 |
| VK3.30 | IGKV3-20*01 F    | 95.0 | Caagtattatgactcagctccagccaccctgtcttctccagggaacagccaccctctcctg<br>caggccagtcagagtgtagcagcagcagctcctggatccagcagaaaccaggaaagctcc<br>caggtcctcatctatggtagcagcagggccactggatccagacaggttcagtgccagtg<br>ggctctgggacagagttcactctccatcagcagcctgagcctggaagatttgcagttattctgt<br>cagaagtagtagtccctcc                   | Ch13:1 |
| VK6.31 | IGKV6-21*01 ORF  | 96.4 | Gaaatgtgtagtactcagctccagccttctgtctgacttaaggaagtcaccatcact<br>cccaggccagtcagagcattgtagtagttagcctggatccagcagaaaccaggaaagctcc<br>aaagctcctcatcaagtagctccagctcactcaggggtccctcaaggttcagtgccagtgga<br>ctgggacagatttcaacctcactatcaatagcctggaagctggaagatgctgcagatttactgtc<br>agcagagtagtagttccctca                | Ch13:1 |
| VK1.32 | IGKV1-27*01 F    | 95.3 | Gccatccagatgaccagctccatctccctgtctgcatcgtaggagacagagtcaccatcact<br>cccggccagtcagagcattgtagtagttagcctggatcagcagaaaccaggaaagctcc<br>aagcctcctgatctatgctcagctcaggttgaaggtgggtccatcaggttcagtgccagtgatc<br>tgggacagatttcaactcaccatcagcagcctgcaacctggaaggttgcacttattctgtcaa<br>aagtgtagcagtgccctcc               | Ch13:1 |
| VK2.33 | IGKV2-28*01 F    | 93.9 | Gatattgtgtagtaccagactccatctccctgctgcatcgtaggagacagagtcaccatcact<br>tcaggctcagtcagagccttctgtagtagttagcctggatcagcagaaaccaggaaagctcc<br>caggccagctccacagcctcctgatctattagtttaactcgggctccggggtccagcaggtt<br>cagtgccagtgggcagggcagcagatttcaactgaaatcagcagagtgaggctgagagcgtg<br>gggttattactgcatgcaagctcacaacctcc | Ch13:1 |
| VK2.34 | IGKV2-30*02 [F]  | 93.5 | Gatgtgtgtagtactcagctccactcctccctcaccatcaccctggacagcggcctcactctc<br>caggttagtcagagctttagacagtagtggaacacctctgattgtagtagcagcagaagcc<br>aggccaaacctcaagctcctgattataagtttcaactcgggactcggggtccagcagagct<br>agcggcagtgggcagggcagcagatttcaactgaaatcagcagagtgaggctgagaggtt<br>gggttattactcggcgaaggtacaaggttccctcc  | Ch13:1 |
| VK3.35 | IGKV3D-15*01 F   | 94.6 | gaaacagtgatgacgagctccagccaccctgtcttctccagggaacagccaccctctc<br>ctcaggcccaagtcagagtgtagcagcagcttagcctggatccagcagaaaccaggaaagctcc<br>tccagcctcctcatctatgctcagcagcggccactggatccagcagaaaccaggaaagctcc<br>gtgggtctggaacagagttcactctccatcagcagcctggaagctggaagatttgcagtttata<br>ctgtcagcagagagtagtacc             | CAK    |
| VK3.36 | IGKV3-NL5*01 F   | 94.3 | gaaatagtgatgacgagctccagccaccctgtcttctccagggaacagccaccctctc<br>tcaggcccaagtcagagtgtagcagcagcttagcctggatccagcagaaaccaggaaagctcc<br>tcaggcccaagtcagagtgtagcagcagcttagcctggatccagcagaaaccaggaaagctcc                                                                                                          | CAK    |

|        |                |      |                                                                                                                                                                                                                                                                                                                 |        |
|--------|----------------|------|-----------------------------------------------------------------------------------------------------------------------------------------------------------------------------------------------------------------------------------------------------------------------------------------------------------------|--------|
|        |                |      | cccaggctctcatgatgatccagcaggccactggcctccggacagggtcagtgccag<br>cgggtcgggacagactcctcaccgctcagcagcctggagcctgaagatttgcagttattct<br>gtcagcaggagagtaactggc                                                                                                                                                             |        |
| VK1.37 | IGKV1D-16*01 F | 95.3 | Gacatccagatgaccagctccactccctgctcctgtaggagacaaagtccatcact<br>gcccagcagtcagggattagcagctggttagcctggtatcagcagaaccaggaaagccc<br>ctaagccctgatctataagcctccagcttgcagaagtggtggctcccaagggtcagcggcagtg<br>gatcgggacagattcactcaccatcagcagcctgagcctgaagatttgcactattactgtc<br>aacagtagtagttaccct                              | CAK    |
| VK2.38 | IGKV2-40*01 F  | 94.9 | Gatattgtagtaccagactccactccctgcccgtcaccctggagagccggcctccatcct<br>gcaggtctagtcagagcctctggatagtgaaagtgaaacacactattggattgtagctgcaga<br>agccgggcccagctccacagcctctgattatgaggtttccaaacgggcccctggagtcacagaca<br>ggttcagtgccagtggtcagacactgatttcaacatgaaatcagcagagtgaggctgaggat<br>gttggggttattactgcatgcaaggtatagatctct  | Ch13:2 |
| VK2.39 | IGKV2-40*01 F  | 90.5 | Gacattctgtgaccagactccactgctccctgcccgtcaccctggagagccggcctccatcct<br>gcaggtctagtcagagcctctgcatagtaagtgaaacacactattggattgtagcagaagc<br>caggccagctccacagcctctgatctatgaggttccaaacgggcccctggagtcacagagaggt<br>cagtgccagtggtcagacactgatttcaactgaaatcaacctggggagggctgaggatgtg<br>gggttattactgcatgacagacta               | Ch13:2 |
| VK1.40 | IGKV1-27*01 F  | 86.3 | Gccatccagatgaccagctccactccctgctgtatctgtaggagacggagtcaccatcact<br>gccaggaagtcaggcctatgcaatgagtgacctggtatcagcagaaccaggaaattcctct<br>aagccttatataaaagatccaaattgcagacagggtagcactcagttcattgggtggatct<br>ggaatagattcactcacaataaacaactcagcctgacaggggtgcaactattactgccaac<br>aggagaatagttccccttg                         | Ch13:2 |
| VK2.41 | IGKV2-28*01 F  | 92.2 | Gatattgtagtaccagactccactccctgctgtatctgtaggagacggagtcaccatcact<br>gcaggtctagtcagagcctctgcatagtaagtggtacacactattgtagtactgcagaagcc<br>agccagctccacagcctctgactattgtttccaaacgggcccctggagtcctgacaggttca<br>gtggcagtggtcagcagcactgatttcaactgaaatcagccgggtggagggctgaggatgtgg<br>gtttattactgcatgcaaaactcacaactcctcc      | Ch13:2 |
| VK1.42 | IGKV1-27*01 F  | 92.1 | Gacatccagatgaccagctccactccctgctgcatctgtaggagacacagtcaccatcact<br>gcccgggagtcaggccttaaaacagggttagactggtatcagcagaaccagggaaagcc<br>ctcaactcctgactctgctccagcttggcagacggggctcactcctgagtcagtgccagtg<br>atctgggacagatttcaactcaccatcagcagcctgagcctgaagatttgcactattactgtc<br>aacaggattataatcccc                          | Ch13:2 |
| VK2.43 | IGKV2-40*01 F  | 91.1 | Attgtagtaccagactccactccctgcccgtcaccctggagagccggcctccatcctgc<br>aggtctagtcagagcctctgcatagtaagtgatacactattgtagtactgcagaagccgg<br>gtcagctccacagcctctgactgatttggctcacaacgggcccctggagtcacagaggtcagtg<br>cagtggtcagcagcactgatttcaactgaaatcagcgggtggagggctgaggatattgggtt<br>ataattgcatgcaaggtacacagcttct               | Ch13:2 |
| VK2.44 | IGKV2-40*01 F  | 93.5 | Gatattgtagtaccagactccactccctgcccgtcaccctggagagccggcctccatcct<br>gcaggtctagtcagagcctctgtagatgtagcgggtaacacttggactgtagcctgcagaagc<br>caggccagctccacagcctctgactgatttggctcacaacgggctctggagtcctgacaggtt<br>cagtgccagtggtcagcagcactgatttcaactgaaatcagccgggtggagagctgaggatgtg<br>gggttattactgtagtcaaaatagagttctct      | Ch13:2 |
| VK2.45 | IGKV2-40*02 F  | 83.3 | Attgtagtaccagactccactccctgctgctcaccctggagagccagcctctgctcctg<br>caggttagtcagagcctctcacaaggggtgaaaaaacactattgtagtactgcagaagcc<br>agccagctccacagcctctgactatttggctcacaacgggcccctgagtcacagcaggttcc<br>gtggcagtggtcagacactgatttcaactgaaatcagcgggtggagagctgaggatgtggg<br>atttaccgcatgcaaaatagagcttct                   | Ch13:2 |
| VK2.46 | IGKV2-40*01 F  | 93.3 | Gatattgtagtaccagactccactccctgcccgtcaccctggagagccggcctccatcct<br>gcaggtctagtcagagcctctgtagatgtaggaaagtgaaacacactattggattgtagcctgaga<br>agccgggcccagctccacagcctctgattatgaggttccaaacgggcccctggagtcacagaca<br>ggttcagtgccagtggtcagacactgatttcaactgaaatcagcagagtgaggctgaggat<br>gttggggttattactgcatgcaatatacacacttct | Ch13:2 |
| VK2.47 | IGKV2-40*01 F  | 88.7 | Gacattctgtgaccagactccactccctgcccgtcaccctggagagccggcctccatcct<br>gcaggtccagtcagagcctctgcatagtaagtgaaacacactcacttactgtagcctgcagaagc<br>caggccagctccacagcctctgattatgaggttccaaacgggcccctggagtcacagaggtt<br>cagtgccagtggtcagacactgatttcaactgaaatcaacctggggagggctgaggatgtg<br>gggttattcctgcatgcaactcacaatggcccc       | Ch13:2 |
| VK2.48 | IGKV2-40*01 F  | 90.8 | Gatattgtagtaccagactccactccctgcccgtcaccctggagagccggcctccatcct<br>gcaggtccagtcagagcctctgtagatgtaggaaacacactattgtagtactgcagaacc<br>agccagctccacagcctctgatttggctcacaacgggcccctggagtcacagacaaggtc<br>agtgccagtggtcagcagcactgatttcaactgaaatcagcaggggtggagctgaggatgtgg<br>gtttattactgcatgcaagctcagctcctc               | Ch13:2 |
| VK1.49 | IGKV1-27*01 F  | 91.8 | Gacatccagatgaccagctccactccctgcccgtcaccctggagagccggcctccatcct<br>gcccgggacagtcaggcctcctgtagatgtaggatacactattgtagtactgcagaagc<br>ctacactcctctcattctgtagcaggttgcatacaggggtcccactcagttcagtgccagtgat<br>ctgggacagatttcaactcaccatcagcagcctgagcctgaagatttgcactattactgtcga<br>caggattataatcccc                          | Ch13:2 |
| VK2.50 | IGKV2-40*01 F  | 92.5 | Gatattgtagtaccagactccactccctgcccgtcaccctggagagccggcctccatcct<br>tgaggcttagtcagagcctcctggatagtaggatacactattgtagtactgcagaagc<br>caggccagctccacagcctctgatttggctcacaacgggcccctggagtcacagacaggtt<br>cagtgccagtggtcagcagcactgatttcaactgaaatcagcaggggtggagggctgaggatgtg<br>gggttattactgcatgcaaaactcacaactcct           | Ch13:2 |
| VK2.51 | IGKV2-28*01 F  | 93.5 | Gatattgtagtaccagactccactccctgcccgtcaccctggagagccggcctccatcct<br>gcaggtctagtcagagcctctgcatagtaagtgatacactattgtagtactgcagaagcca<br>ggccagctccacagcctctgatttggctcacaacgggcccctggagtcacagcaggttca<br>gtggcagtggtcagcagcactgatttcaactgaaatcagccgggtggagggctgaggatgtgg<br>gtttattactgctgcaagatatacagcttctc            | Ch13:2 |
| VK1.52 | IGKV1-12*01 F  | 90.2 | gatatccagatgaccagctccactccctgcccgtcaccctggagagccggcctccatcct<br>gcccggcgagtcagaacattatagtggttagcgtgtagcagcagaaccaggaaagccctta<br>agctcctgactatgctgcaaccagattgaaagtggttccctcggctcagcggcagtggtat<br>gggacagatttcaactcaccatcagcagcctgagcctgaagatttgcactattactgtcaac<br>aggtttagtaacccctc                           | Ch13:2 |
| VK2.53 | IGKV2-40*01 F  | 92.2 | Gatattgtagtaccagactccactccctgcccgtcaccctggagagccggcctccatcct<br>caggtctagtcagagcctctgcatagtgatgatacactattgtagtactgcagaagcc<br>agccagctccacagcctctgatttggctcacaacgggcccctggagtcacagaggttca<br>gtggcagtggtcagcagcactgatttcaactgaaatcagcaggggtggagggctgaggatgtgg<br>gtttattactgctgcaagatatacagcttctc               | Ch13:2 |
| VK1.54 | IGKV1-27*01 F  | 91.8 | Gacatccagatgaccagctccactccctgcccgtcaccctggagagccggcctccatcact<br>gcccagggagtcaggccttaactatgatttagcctgtagcagcagaaccagggaaacactcct<br>aagcctgactatgagcctcaggttgcagaagtggttccctcctgctcagcggcagtgat<br>ctggacagatttcaactcaccatcagcagcctgagcctgaagatttgcactattactgtcaac                                              | Ch13:2 |

|        |               |      | attattacagtagccccctcc                                                                                                                                                                                                                                                                                              |        |
|--------|---------------|------|--------------------------------------------------------------------------------------------------------------------------------------------------------------------------------------------------------------------------------------------------------------------------------------------------------------------|--------|
| VK1.55 | IGKV1-16*01 F | 93.2 | Gacatccagatgaccagctccatctccctgctgcatctgtaggagacagagtcaccatcactgcccagggagtcagggcattagcaataaattagcctggatcagcagaaaacggggaagcccctaagctcctgatctataagccatccactctgcaaaagtggggtccatcaagggtcagcggcaggtgacitgggacagattcactctcaccatcagcagcctgagcctgaagatttgcaacttattactgtagcaatggtatggtatcc                                   | Ch13:2 |
| VK2.56 | IGKV2-40*01 F | 92.6 | Gatattgtagtagccagactccactctccctgcccacccccggagagccggcctccatctctcaggtctagtcagagctctctggatagtagtgatgatacacatttgattggtactcgcagaagccagggccagcctccacagcccataatctatttttcaagccggcctctggagtcocagacaggttcagtgggcagtgatcaggcaggtattcacactgaaaatcagcgggtggaggtgagtagtggtgggttattactgcatgcaatgtagatgatttcc                      | Ch13:2 |
| VK1.57 | IGKV1-39*01 F | 93.9 | Gacatccagatgaccagctccatctccctgctgcatctgtaggagacagagtcaccatcactgcccagggcaagtgagaacttaacaacttattacatggatcagcagaaaacagggaaagccccaaagcctctgatctatgctcctcctcctgcaaaagtggggtccatcaagggtcagcggcagtgtagctggagcagatttcaactcaccatcagcagcctgagaggtgcaacttattactgtagcacaatgtagtaccctcc                                         | Ch13:2 |
| VK2.58 | IGKV2-29*02 F | 91.8 | Gatattgtagtagccagactccactctccctgcccagtcaccctggagagccggcctccatctctcaggtctagtcagagcctcctgatagtaggaaatactatttgattggtactacagaagcccagggcagctccacggctcctcaattatagagtttccaacgggttctctggagtcacagacaggttagtgccagtgatcagcagcagatttcaactgaaaatcagcgggtggaaggtgaggtgtaggggttattactgcatgcaagcttcaaaactcctcc                     | Ch13:2 |
| VK2.59 | IGKV2-40*01 F | 92.2 | Gatattgtagtagccagactccactctccctgcccacccccggagagccggcctccatctctcaggtctagtcagagcctcctcctgatagtaaggaacaactatttgactgtagcctgcagaagccaaagcctctgatctatagggcctcctcaattgggggttccaacagagcctctggagtcocagacaggttcagtgccagtggtcaggcagctgattcacactgaaaatcagcagggtgagggcggaggtgtaggggttattactgcatgcaagcttcaaaactcctcc             | Ch13:2 |
| VK2.60 | IGKV2-29*02 F | 92.9 | Gatattgtagtagccagactccactctccctgcccagtcaccctggagagccggcctccatctctcaggtctagtcagagcctcctcctgatagtaaggaatactatttgattggtactcgcagaagcccagggcagctccacggctcctcaatctatagagtttccaacgggttctctggagtcacagacaggttagtgccagtgatcagcagcagatttcaactgaaaatcagcgggtgagggctgaggtgtaggggttattactgcatgcaagcttcaaaactcctcc                | Ch13:2 |
| VK1.61 | IGKV1-33*01 F | 92.5 | Gacatccagatgaccagctccatctccctgctgcatctgtaggagacagagtcaccatcactgcccagggcagtgaggtattagcaactggtggcctggatcacaagaaaacagggaaagcccctaagctcctgatctatagggcctcaattggaaacaggggtccatcaagggtcagtggaaggtgacitgggacagatttcaactcaccatcagcagcctgagcctgaagatagcacaatattactgtagcacaagcagataatccctcc                                   | Ch13:2 |
| VK2.62 | IGKV2-40*01 F | 91.5 | Gatattgtagtagccagactccactctccctgcccagtcaccctggagagccggcctccatctctcaggtctagtcagagcctcctcctgatagtaaggaacaactatttgattggtactcgcagaagccagggcagctccacggctcctgatctataaagttaccaatcgggaatcggggtccagacaggttcagtgccagtggtcaggcagagattcacactgaaaatcagcagggtgagcctgaggtgtaggggttattactgcatgcaagctcaaaaagatcc                    | Ch13:2 |
|        |               |      |                                                                                                                                                                                                                                                                                                                    |        |
| JK1    | IGKJ1*01      | 100  | gtggacgttcggccaagggaccaaggtggaatcaaac                                                                                                                                                                                                                                                                              | Ch13:1 |
| JK2    | IGKJ2*01      | 92.3 | tgtagcagtttggccaggggaccaaaagtgtagatcaaac                                                                                                                                                                                                                                                                           | Ch13:1 |
| JK3    | IGKJ3*01      | 94.7 | attcactttcggccccgggacaaactggatcaaac                                                                                                                                                                                                                                                                                | Ch13:1 |
| JK4    | IGKJ4*01      | 100  | gctcactttcggcggaggaccaaggtgtagatcaaac                                                                                                                                                                                                                                                                              | Ch13:1 |
| JK5    | IGKJ5*01      | 100  | gatcacttcggccaagggacacagcagctggagattaaac                                                                                                                                                                                                                                                                           | Ch13:1 |
| CK1    | IGKC1*01      | 91.9 | gagcgtggctgcccactctgcttctcctcctccatctgaggtcaggtgaaatcggaaactgctctctgtgctgctgtaataactctatcccagagagggcagcgtaaagtggaaggtgaggtgctcctcaaaaacggglaactcccagagaggtgtagcagagcagggcagcagaagcaaacactacagcctgagcagcaccctgacgctgagcagcagactaccagaggtcacaatgctatgctcggaaagtcacccatcagggcctgagcctgcccctcaccagagcttcaacagagggaggtg | Ch13:1 |

<sup>a</sup>Open reading frames (ORFs) were annotated based on gene family usage and position relative to the junction between the V and J regions, with the most proximal gene segment receiving number 1 (e.g VK5.2 correspond to family 5, VK ORF number 2 from the V-J junction, JK2 is the second J gene segment from the V-J junction). Since the locations of the contigs in the chromosome were unknown they were annotated as if following after the first assembled chromosomal sequence. F indicates functional. P indicates pseudogene. Annotations were given a dot (.) between the V family name and the family member gene number instead of a dash (-), as in the annotations for human Ab genes, to minimize confusion with the final annotations of the rhesus Ig loci that will be possible to do when a complete genome assembly is available.

<sup>b</sup>Closest matching human germline VH gene was determined via IMGT/V-Quest. JK and CK gene segments were compared to allele \*01.

<sup>c</sup>Homology (%) between the rhesus and closest matching human germline as determined by IMGT/V-Quest or AlignX

<sup>d</sup>Raw sequences are available via [www.ensembl.org](http://www.ensembl.org)

Sequences were extracted from genome assembly: MMUL 1.0, Feb 2006, database v. 66.10

Ch13:1 corresponds to chromosome 13 region: 89,000,000-90,500,000

Ch13:2 corresponds to chromosome 13 region: 112,900,000-113,700,000

CAK corresponds to contig MMUL:1099548049606

**Table S4. Properties of the CD4bs-specific flow cytometric sorts.**

| Animal                                                                        | F125                      | F128                             |
|-------------------------------------------------------------------------------|---------------------------|----------------------------------|
| Immunization                                                                  | 2 weeks post imm 5        | 1 week post imm 5                |
| Probe                                                                         | gp140-F/<br>gp140-F-D368R | gp140-F/<br>gp140-F-D368R        |
| Total PBMC                                                                    | 2552940                   | 521082                           |
| Total Memory B cell<br>CD20+IgG+CD27+                                         | 102789                    | 6990                             |
| Total Memory B cell %                                                         | 4.0                       | 1.3                              |
| Total Memory B cell Env+<br>CD20+IgG+CD27+gp140-F+                            | 4737                      | 270                              |
| Memory B cell Env+ %                                                          | 4.6                       | 3.9                              |
| <sup>a</sup> CD4bs Memory B cell<br>CD20+IgG+CD27+<br>gp140-F+ gp140-F-D368R- | 287                       | 34                               |
| CD4bs % (of total Env+)                                                       | 6.1                       | 12.6                             |
| Sorted cells                                                                  | 264                       | 29                               |
| Productive Ab sequences<br>with matching HC+LC <sup>b</sup>                   | 25 (from 88 wells)        | 17                               |
| Expressed MAbs                                                                | Not done                  | 11                               |
| Env-specific                                                                  | Not done                  | 9 (8 unique clones) <sup>c</sup> |

<sup>a</sup>CD4-binding site directed memory B cell

<sup>b</sup>All RT-PCR sequences were antibody specific

<sup>c</sup>GE140 and GE145 were identical clones

Table S5. Binding affinities of vaccine- and infection-elicited MAbs to a panel of Env ligands

| CD4bs ligands            | gp120         |                               |                          | gp120-D368R          |                               |                          | Core (V3S)           |                               |                          | Stabilized core (2CC) |                               |                          | TriMut core          |                               |                          |                      |
|--------------------------|---------------|-------------------------------|--------------------------|----------------------|-------------------------------|--------------------------|----------------------|-------------------------------|--------------------------|-----------------------|-------------------------------|--------------------------|----------------------|-------------------------------|--------------------------|----------------------|
|                          | $K_D$<br>(nM) | on-rate<br>( $M^{-1}s^{-1}$ ) | off-rate<br>( $s^{-1}$ ) | $K_D$<br>(nM)        | on-rate<br>( $M^{-1}s^{-1}$ ) | off-rate<br>( $s^{-1}$ ) | $K_D$<br>(nM)        | on-rate<br>( $M^{-1}s^{-1}$ ) | off-rate<br>( $s^{-1}$ ) | $K_D$<br>(nM)         | on-rate<br>( $M^{-1}s^{-1}$ ) | off-rate<br>( $s^{-1}$ ) | $K_D$<br>(nM)        | on-rate<br>( $M^{-1}s^{-1}$ ) | off-rate<br>( $s^{-1}$ ) |                      |
| NHP<br>MAbs              | GE121         | 9.7                           | $2.8 \times 10^4$        | $2.7 \times 10^{-4}$ | >5000                         | NB                       | NB                   | 0.9                           | $3.2 \times 10^5$        | $2.9 \times 10^{-4}$  | >8000                         | NB                       | NB                   | 4.4                           | $1.7 \times 10^5$        | $7.5 \times 10^{-4}$ |
|                          | GE125         | 4.2                           | $3.9 \times 10^4$        | $1.7 \times 10^{-4}$ | 247.3                         | $6.7 \times 10^3$        | $1.7 \times 10^{-3}$ | 0.4                           | $3.5 \times 10^5$        | $1.5 \times 10^{-4}$  | >8000                         | NB                       | NB                   | 2.3                           | $1.8 \times 10^5$        | $4.0 \times 10^{-4}$ |
|                          | GE136         | 13.7                          | $3.9 \times 10^4$        | $5.3 \times 10^{-4}$ | >5000                         | NB                       | NB                   | 1.4                           | $3.2 \times 10^5$        | $4.5 \times 10^{-4}$  | >8000                         | NB                       | NB                   | 4.3                           | $1.7 \times 10^5$        | $7.2 \times 10^{-4}$ |
|                          | GE137         | 14.8                          | $3.8 \times 10^4$        | $5.6 \times 10^{-4}$ | 66.7                          | $1.7 \times 10^4$        | $1.1 \times 10^{-3}$ | 7.5                           | $2.3 \times 10^5$        | $1.7 \times 10^{-3}$  | >8000                         | NB                       | NB                   | 15.9                          | $1.4 \times 10^5$        | $2.2 \times 10^{-3}$ |
|                          | GE140         | 7.1                           | $4.6 \times 10^4$        | $3.3 \times 10^{-4}$ | >5000                         | NB                       | NB                   | 1.8                           | $4.0 \times 10^5$        | $7.0 \times 10^{-4}$  | >8000                         | NB                       | NB                   | 3.2                           | $2.0 \times 10^5$        | $6.4 \times 10^{-4}$ |
|                          | GE143         | 2                             | $2.6 \times 10^4$        | $5.0 \times 10^{-5}$ | >5000                         | NB                       | NB                   | 2                             | $1.6 \times 10^5$        | $3.2 \times 10^{-4}$  | >8000                         | NB                       | NB                   | 5.6                           | $8.0 \times 10^4$        | $4.4 \times 10^{-4}$ |
|                          | GE147         | 103.4                         | $6.0 \times 10^3$        | $6.5 \times 10^{-4}$ | >5000                         | NB                       | NB                   | 2840                          | $1.3 \times 10^3$        | $3.6 \times 10^{-3}$  | >8000                         | NB                       | NB                   | >5000                         | NB                       | NB                   |
| GE148                    | 4.2           | $5.6 \times 10^4$             | $2.3 \times 10^{-4}$     | >5000                | NB                            | NB                       | 0.6                  | $5.0 \times 10^5$             | $2.9 \times 10^{-4}$     | 2042                  | $5.6 \times 10^3$             | $1.0 \times 10^{-2}$     | 2                    | $2.3 \times 10^5$             | $4.5 \times 10^{-4}$     |                      |
| Receptor                 | CD4-Ig        | 14                            | $3.6 \times 10^4$        | $5.0 \times 10^{-4}$ | >5000                         | NB                       | NB                   | 4.4                           | $1.1 \times 10^5$        | $4.7 \times 10^{-4}$  | 5.7                           | $1.5 \times 10^5$        | $7.5 \times 10^{-4}$ | 812.7                         | $9.5 \times 10^4$        | $7.7 \times 10^{-2}$ |
| bNAbs<br>(CD4 bs)        | VRC01         | 9.5                           | $1.8 \times 10^4$        | $1.7 \times 10^{-4}$ | 348.8                         | $1.5 \times 10^4$        | $5.4 \times 10^{-3}$ | 2.7                           | $4.5 \times 10^4$        | $1.2 \times 10^{-4}$  | 0.7                           | $8.3 \times 10^4$        | $0.6 \times 10^{-4}$ | 36.6                          | $1.7 \times 10^4$        | $6.3 \times 10^{-4}$ |
|                          | b12           | 27.4                          | $9.8 \times 10^4$        | $2.7 \times 10^{-3}$ | >5000                         | NB                       | NB                   | 5.9                           | $4.6 \times 10^5$        | $2.7 \times 10^{-3}$  | 54.7                          | $1.6 \times 10^5$        | $8.8 \times 10^{-3}$ | 18                            | $3.0 \times 10^5$        | $5.4 \times 10^{-3}$ |
|                          | HJ16          | 643.8                         | $7.7 \times 10^4$        | $5.0 \times 10^{-2}$ | 203.6                         | $5.8 \times 10^4$        | $1.2 \times 10^{-2}$ | 22.4                          | $3.6 \times 10^4$        | $8.1 \times 10^{-4}$  | 182.7                         | $9.4 \times 10^3$        | $1.7 \times 10^{-3}$ | 62.6                          | $2.0 \times 10^4$        | $1.2 \times 10^{-3}$ |
| non-<br>bNAbs<br>(CD4bs) | b6            | 1.2                           | $8.3 \times 10^4$        | $1.0 \times 10^{-4}$ | 3.8                           | $7.0 \times 10^4$        | $2.7 \times 10^{-4}$ | 0.5                           | $5.4 \times 10^5$        | $2.5 \times 10^{-4}$  | >8000                         | NB                       | NB                   | 0.5                           | $3.5 \times 10^5$        | $1.7 \times 10^{-4}$ |
|                          | b13           | 17.4                          | $2.7 \times 10^4$        | $4.8 \times 10^{-4}$ | >5000                         | NB                       | NB                   | 7.4                           | $7.6 \times 10^4$        | $5.6 \times 10^{-4}$  | 2151                          | $3.5 \times 10^3$        | $7.4 \times 10^{-3}$ | 13.5                          | $6.8 \times 10^4$        | $9.1 \times 10^{-4}$ |
|                          | F105          | 19.1                          | $7.0 \times 10^4$        | $1.3 \times 10^{-3}$ | >5000                         | NB                       | NB                   | 7.8                           | $5.0 \times 10^5$        | $3.9 \times 10^{-3}$  | >8000                         | NB                       | NB                   | 17.6                          | $2.7 \times 10^5$        | $4.7 \times 10^{-3}$ |

NB, No binding observed

Affinity (KD) was calculated by dividing the on-rate with the off-rate, as determined by Bio-Layer interferometry

**Table S6. Antibody conjugates used for flow cytometric sorting of memory B cells.**

| <b>Antibody Conjugate</b> | <b>Manufacturer</b>          | <b>Clone name</b> |
|---------------------------|------------------------------|-------------------|
| CD3 APC-Cy7               | BD Pharmingen                | SP34-2            |
| CD8 Pacific Blue          | BD Pharmingen                | RPA-T8            |
| CD14 Qdot 605             | Vaccine Research Center, NIH | M5E2              |
| CD20 PE-Alexa Fluor 700   | Vaccine Research Center, NIH | 2H7               |
| CD27 PE-Cy7               | BD Pharmingen                | M-T271            |
| IgG FITC                  | BD Pharmingen                | G18-14            |
| IgM PE-Cy5                | BD Pharmingen                | G20-12            |
